## A FinnGen pilot clinical recall study for Alzheimer's disease

**Valtteri Julkunen<sup>1,2,3,#</sup>, Claudia Schwarz<sup>3,4</sup>, Juho Kalapudas<sup>1</sup>, Merja Hallikainen<sup>1</sup>, Aino-Kaisa Piironen<sup>5</sup>, Arto Mannermaa<sup>5</sup>, Hanna Kujala<sup>5</sup>, Timo Laitinen<sup>5</sup>, Veli-Matti Kosma<sup>5</sup>, Teemu I. Paajanen<sup>6</sup>, Reetta Kälviäinen<sup>1</sup>, Mikko Hiltunen<sup>1</sup>, Sanna-Kaisa Herukka<sup>1</sup>, Sari Kärkkäinen<sup>1</sup>, Tarja Kokkola<sup>1</sup>, Mia Urjansson<sup>3</sup>, FinnGen, Markus Perola<sup>7</sup>, Aarno Palotie<sup>8,9,3</sup>, Eero Vuoksimaa<sup>3,\*,#</sup>, Heiko Runz<sup>10,\*,#</sup>**

<sup>1</sup>*Institute of Clinical Medicine/Neurology, University of Eastern Finland, Kuopio, Finland*

<sup>2</sup>*Department of Neurology, Neurocenter, Kuopio University Hospital, Kuopio, Finland*

<sup>3</sup>*Institute for Molecular Medicine Finland (FIMM), HiLIFE, University of Helsinki, Finland*

<sup>4</sup>*Department of Neurology, University Medicine Greifswald, Greifswald, Germany*

<sup>5</sup>*Biobank of Eastern Finland, Kuopio, Finland*

<sup>6</sup>*Work Ability and Working Careers, Finnish Institute of Occupational Health, Helsinki, Finland*

<sup>7</sup>*Finnish Institute for Health and Welfare (THL), Helsinki, Finland*

<sup>8</sup>*Analytic and Translational Genetics Unit, Department of Medicine, Department of Neurology and Department of Psychiatry Massachusetts General Hospital, Boston, MA, USA*

<sup>9</sup>*The Stanley Center for Psychiatric Research and Program in Medical and Population Genetics, The Broad Institute of MIT and Harvard, Cambridge, MA, USA*

<sup>10</sup>*Translational Sciences, Biogen, Cambridge, MA, USA*

\* equal contribution

# Correspondence: [valtteri.julkunen@uef.fi](mailto:valtteri.julkunen@uef.fi), [eero.vuoksimaa@helsinki.fi](mailto:eero.vuoksimaa@helsinki.fi)

or [heiko.runz@gmail.com](mailto:heiko.runz@gmail.com)

## ABSTRACT

**Background:** Successful development of novel therapies requires that clinical trials are conducted in patient cohorts with the highest benefit-to-risk ratio. Population-based biobanks with comprehensive health and genetic data from large numbers of individuals hold promise to facilitate identification of trial participants, particularly when interventions need to start while symptoms are still mild, such as for Alzheimer's disease (AD). However, few studies have yet tested whether recalling biobank participants into clinical follow-up studies is feasible.

**Objective:** To establish a process for clinical recall studies from FinnGen and demonstrate the feasibility to systematically ascertain customized clinical data from FinnGen participants with ICD10 diagnosis of AD or mild cognitive disorder (MCD).

**Methods:** Single-center cross-sectional study testing blood-based biomarkers and cognitive functioning in-person, computer-based and remote.

**Results:** 19% (27/140) of a pre-specified FinnGen subcohort were successfully recalled and completed the study. Hospital records largely validated registry entries. For 8/12 MCD patients, other reasons than AD were identified as underlying diagnosis. Cognitive measures correlated across platforms, with highest consistencies for dementia screening ( $r=0.818$ ) and semantic fluency ( $r=0.764$ ), respectively, for in-person versus telephone-administered tests. GFAP ( $p<0.002$ ) and pTau-181 ( $p<0.020$ ) most reliably differentiated AD from MCD participants.

**Conclusions:** Informative, customized clinical recall studies from FinnGen are feasible.

## INTRODUCTION

Alzheimer's disease (AD) is the most common neurodegenerative condition and a major socio-economic challenge. It has been estimated that during the next four decades the prevalence of AD will quadruple from 27 to 106 million by which time 1 in 85 individuals worldwide will be living with the disease. Even a modest delay of disease onset could reduce the number of cases substantially (1). Interventions for AD are expected to be most efficacious when initiated in prospective patients at the earliest stages of disease (2). However, due to the lack of curative therapies or easily measurable biomarkers, it is current clinical practice that a majority of the patients receives their diagnosis only at progressed stages when irreversible alterations to brain and cognitive performance have already occurred. There is thus a substantial interest across industry and academia to identify AD patients early, and to align on measures that reliably diagnose the disease at the earliest possible stages to refine its onset and predict its course and response to experimental treatments.

Population-based, large-scale biobank studies that link detailed longitudinal health information with genetic and biomarker data are expediting the development of tools to identify individuals with a high probability to develop AD and other late onset diseases (3–5). They further hold the promise to accelerate recruitment of newly diagnosed patients or individuals at risk into observational and interventional clinical trials, or to facilitate access to efficient treatments (6,7). However, thus far few studies have overcome the scientific, logistical, and ethical challenges to recall individuals consented for broad population-level biobank research into customized clinical follow-up studies based on their individual-level health, genetic, or biomarker data.

The FinnGen (FG) study ([www.finngen.fi](http://www.finngen.fi)) is a precompetitive partnership between thirteen industry partners and the Finnish biobanks to genetically profile and link genetics with detailed biomedical and social information in 10% of the Finnish population. Since its inception in 2017, FG has recruited over 500,000 participants with registry data on more than 2,000 harmonized disease endpoints and contributed to numerous scientific discoveries (8,9). FG participants are broadly consented for secondary use of research data and in principle re-contactable for follow-up studies through participating biobanks.

Here, we established a process for recalling FG participants fulfilling distinct, pre-specified inclusion criteria into a clinical follow-up study to obtain customized novel clinical and biomarker data. In a single-center, cross-sectional pilot study, we targeted a population that based on registry entries had been diagnosed (ICD10) with either AD or mild cognitive disorder (MCD). We assessed the accuracy of FG registry versus hospital records, applied three different approaches to evaluate cognitive functioning via in-person neuropsychological assessment, computerized and telephone-administered testing, and obtained blood-based AD biomarkers. Our results validate the accuracy of clinical information captured in Finnish registries, support remote cognitive testing as an effective screening approach, and demonstrate that recall studies from FG are feasible.

## MATERIALS AND METHODS

### Study participant selection

For this pilot study we targeted a FG subcohort with registry-defined diagnosis of either a wide definition of AD (ICD10: G30), or a registry entry of the ICD10 code F06.7 “Mild neurocognitive disorder due to known physiological condition”, the closest diagnostic code to mild cognitive impairment, a heterogenous condition frequently used to describe individuals with a higher probability to develop AD. Moreover, study participants were required to have provided consent for recontact, as well as for sample and data usage to the Biobank of Eastern Finland (BEF). The process for accessing biobank data and steps required to operationalize a biobank recall study is guided by the Finnish biobank regulations (<https://ita-suomenbiopankki.fi/en/researchers/>) and visualized in **Figure 2**. In brief, after a positive feasibility assessment by BEF, approval of the study protocol and accompanying documents by the ethics committee of Helsinki University Hospital, and ensuring a permit to access patient files from Kuopio University Hospital (KUH), a request for biobank data access was launched via the Fingenious portal (<https://site.fingenious.fi/>). This triggered a formal evaluation of the study plans by the BEF scientific steering committee and initiation of contracts between participating parties. An updated feasibility assessment by BEF resulted in 150 participants meeting study inclusion criteria. Of these, eight were removed as they were identified as duplicates (same person counted twice in the registry). Two additional individuals were excluded since they lived in institutionalized care with a likely late-stage AD and not being able to travel to the study site. The study participant selection with exclusions is presented in **Figure 1a**.

A total of 140 FG participants were contacted by BEF personnel. Recontact was conducted by using a letter that included study information and forms for informed written consent. To ensure that the study information had reached the potential study participants, and to further enhance the participation rate, all potential participants received a phone call from the BEF study nurse within 1-2 weeks after sending the invitation material. During this phone call the potential participants received standard structured information concerning the study, were asked whether they were willing to participate, and a date for on-site assessment at the University of Eastern Finland (UEF) Brain Research Unit (BRU) was scheduled. Participants willing to participate returned their informed written consents either by mail to BRU, or by bringing the signed forms to their appointment. Participants who completed the in-person and computerized cognitive testing batteries at the BRU received a follow-up phone-call after 1-2 weeks with the aim to perform a remote telephone-administered cognitive assessment. Data obtained during this study are summarized in **Figure 1b**.

### Schedule of assessment

All study participants were invited to UEF-BRU for: a structured interview of the study participant and caregiver or family member to obtaining basic patient information and to fill out questionnaires regarding abilities of daily life and functioning; drawing of blood samples for AD biomarker profiling and optional future biomarker discovery; in-person neuropsychological assessment performed by a trained psychologist; and on-site computer-administered cognitive function testing. Moreover, cognitive function was subsequently evaluated by phone-interview 1-2 weeks later. All cognitive assessments were done in Finnish language. Half of the study participants were randomized to obtain

computerized-testing before in-person testing to reduce the risk of systematic bias from practice effect.

### **Data linkage to FinnGen and hospital records**

In addition to obtaining new clinical and biomarker data, we obtained approval to link these data to previously ascertained health care register data such as hospital diagnoses, medication records, social registry entries, and genetic data. Data linkage was performed in a controlled FG Sandbox environment approved to host individual-level data and accessible only by approved researchers. In addition to data directly ascertained through the study protocol or available through FG, we also analyzed earlier routine care data available for study participants through the patient records from KUH. This data included clinical information from earlier memory clinic and follow-up visits (e.g., historic cognition test results), previous laboratory values (e.g., results from cerebrospinal fluid examinations for AD biomarkers), and neuroimaging data (e.g., magnetic resonance imaging ascertained through routine care). Among others, data linkage offered the possibility to compare the accuracy of FG registry data against hospital records and validate that inclusion criteria were indeed met based on earlier clinical information.

### **In-person neuropsychological testing**

In-person neuropsychological testing included the Consortium to Establish a Registry for Alzheimer's Disease Neuropsychological Battery (CERAD-NB) (10). Additional tests included Logical Memory subtest from the Wechsler Adult Intelligence Scale 3<sup>rd</sup> edition (11), Trail Making Test A (TMT-A) and B (TMT-B) (12), and a short 40-item version of the Stroop test (13). The tests were administered by a trained psychologist at the UEF-BRU. For the current study we investigated the following four specific cognitive domains (with specific measures in parentheses): episodic memory (immediate free recall of words in trials 1-3 and delayed free recall of the 10-word list); executive function (set-shifting: TMT-B controlled for TMT-A); processing speed (TMT-A); and semantic fluency (1-minute animal naming). These measures were selected because similar or corresponding measures were also available in computerized testing and in the telephone interview (described below).

### **Computerized cognitive testing**

We used the cCOG (14) platform developed by Combinostics Oy (<https://www.cneuro.com>), a self-administered computer-based testing tool for assessing cognitive performance at an on-site computer via a keyboard and a mouse. A total of seven tasks measured performance in four specific cognitive domains: episodic memory, executive function, processing speed, and reaction time. An earlier study proposed that cCOG has comparable accuracy to in-person neuropsychological batteries for detecting dementia, and at least moderately correlates with specific in-person neuropsychological tests (14). In this current study, we used episodic memory measures of immediate (total words recalled in trials 1-3) and delayed recall of 12-word list measures. We also used the Modified TMT, with two parts corresponding to the traditional TMT-A and -B, to measure processing speed and executive function (set-shifting). Detailed test descriptions and protocols can be found in Rhodius-Meester et al. (2020)(14). Completing cCOG took participants about 25 minutes.

### **Telephone interview to assess cognitive performance**

We used two validated, telephone-administered cognitive screening instruments: telephone assessment for dementia (TELE) (15) and the modified Telephone Interview for Cognitive Status (TICS-m) (16). Telephone interviews took on average 17 (range 12-33) minutes with an average of 13 (range 9-29) minutes to complete TELE and TICS-m and were conducted by a trained research nurse. For analyses in the current study, we used the following measures: For TELE, we used a continuous score (0-20) and validated cut-offs for cognitive impairment (<16) and healthy cognition (>17.5) (17). From TICS-m, we used episodic memory measures of verbal immediate (total words recalled in trials 1-3) and delayed free recall of 10-word list. In the original TICS-m, there is only a single trial of the 10-word list in the learning condition. Here we modified this task to include three learning trials in order to make this measure more similar to in-person and computerized list learning tasks. In addition, semantic fluency was measured (animals in 1-minute).

### **Assessment of functional status and independence in activities of daily living**

The severity of cognitive symptoms and functioning disability was estimated by the clinical dementia rating scale (CDR) and CDR sum of boxes (CDR-SB) (18) as well as by the 18-item Alzheimer's Disease Cooperative Study – Activities of Daily Living scale (ADCS-ADL) (19). This on-site assessment was done by a trained study nurse and included an interview of the caregiver or family member of the study participant to increase the reliability of data acquisition.

### **AD blood-based biomarkers and *Apolipoprotein E (APOE)* genotype**

The analyses of plasma biomarkers phosphorylated-tau181 (pTau-181), amyloid beta (A $\beta$ )1-40, A $\beta$ 1-42, glial fibrillary acidic protein (GFAP) and neurofilament light chain (NfL) from all 27 patients were performed using Simoa HD-X analyzer (Quanterix, Billerica, Massachusetts, USA), which employs single molecule array digital immunoassay technology. Analyses were performed at the biomarker laboratory of UEF-BRU. Plasma pTau-181 levels were quantified using Simoa pTau-181 Advantage V2 Kit (Ref# 103714, Quanterix) and A $\beta$ 1-40, A $\beta$ 1-42, GFAP and NfL levels using Simoa Neurology 4-Plex E Advantage Kit (Ref# 103670, Quanterix) according to the manufacturer's instructions. Prior to analyses, EDTA plasma samples were thawed, mixed, centrifuged (10,000xg, 5 min, +20°C) and measured in duplicates. All replicates had coefficient of variation below 15%. *APOE* status was defined by two single-nucleotide polymorphisms, rs429358 and rs7412, in chromosome 19. We classified individuals as  $\epsilon$ 4-carriers vs. non-carriers.

### **Statistical analyses**

We compared AD and MCD groups with regards to cognitive function and performed comparisons between in-person, computerized and telephone-administered tests. Cognitive screening instruments were the Mini Mental State Examination (MMSE) as a part of CERAD-NB battery administered in-person and TELE included in the telephone interview. We also classified individuals in cognitively impaired versus cognitively intact based on the CERAD-NB word list learning immediate and delayed recall measures. With regards to specific abilities, we compared performance in the following cognitive domains (measured on at least two platforms): episodic memory, executive function (set-shifting), processing speed, and semantic fluency. Episodic memory was measured in all three

formats (CERAD word list in in-person, TICS 10-word list via telephone and 12-word list in cCOG), processing speed and executive function in two formats (TMT-A & TMT-B in in-person and modified TMT-A & TMT-B in cCOG), and semantic fluency in two formats (1-minute animal fluency both in in-person and telephone testing). Statistical analyses were performed with R version 4.1.1 (available online at <https://www.R-project.org/>). Spearman's rank partial correlation analyses were used to test the associations between in-person, computerized and telephone-administered tests. We report Spearman correlations due to small sample size and non-normal distribution of some of the measures. In addition, cognitive test results, age, and the time from original diagnosis to study visit were compared between AD and MCD groups using independent t-tests. The significance level was set at  $\alpha = 0.05$ .

### **Ethics approvals**

All participants in this recall study were also participants in FG and had provided informed consent for biobank research including an option for recalling into a new scientific study. This procedure is based on the Finnish Biobank Act. All recall study participants and their respective caregiver or family member received detailed information regarding this study by a formal information letter, as well as structured information provided during a phone call. All study participants and their participating caregivers were asked for and provided written informed consent. All study data was initially stored locally at UEF (on-site assessment) and the Finnish Institute for Molecular Medicine (FIMM) (remote cognition assessment by phone). Study results and data were then returned first to BEF and from there further to the FG Sandbox controlled environment to link newly ascertained clinical data with genetic and register data. The recall study was reviewed and approved by the ethics committee of HUS under IRB approval number 990/2017. Additionally, research permissions were granted from BEF (diary ID 1248/2021) and KUH (1535/2021, study ID 5772671).

An alternative process for dedicated biobank consent has been applied for a subset of FG participants. Some of the separate legacy research cohorts collected prior the Finnish Biobank Act came into effect (in September 2013) and start of FG (August 2017) were collected based on previous study-specific consents and later transferred to the Finnish biobanks and eventually to FG after approval by Fimea (Finnish Medicines Agency) and the National Supervisory Authority for Welfare and Health. Recruitment protocols followed the biobank protocols approved by Fimea. The Coordinating Ethics Committee of the Hospital District of Helsinki and Uusimaa (HUS) statement number for the FinnGen study is Nr HUS/990/2017. The permit numbers of the decisions made by Finnish Institute for Health and Welfare and the Biobank Access Decisions for FG samples and data utilized in FG Data Freeze 9 are presented in Acknowledgements.

## RESULTS

### Operationalization of a FinnGen clinical recall study

At the time of study (October 2021-February 2022), FG had ascertained genetic and registry data on 392,499 participants (190,879 females, 151,620 males; DF8, publicly released in December 2022 via [http://finngen.fi/en/access\\_results](http://finngen.fi/en/access_results)). Of these, health records from 11,210 participants were characterized by at least one entry of the FG diagnostic code “G6\_ALZHEIMER” (curated based on ICD10 code G30), reflecting a putative diagnosis of AD. 2,170 participants had at least one entry for ICD10 code F06.7, reflecting a diagnosis of MCD (<http://risteys.finngen.fi/>). For this proof-of-concept recall study, we decided to focus on participants recruited into FG from just one of the nine contributing biobanks, Biobank of Eastern Finland (BEF; (<http://ita-suoimenbiopankki/en/>)). To enable comparison of FG registry data with individual-level health records and limit geographic outreach, we further requested that study participants were still alive, lived within a proximity of 100km from the study site and had earlier been a patient at the Department of Neurology, KUH.

A flow-chart visualizing study participant selection and data ascertained during study are provided in **Figure 1**, and the process how this FG recall study was operationalized is described in **Figure 2** and Methods. In brief, over a period of 15 business days, 277 phone calls were made (maximum of 3-4 calls/person) of which 151 were not answered. A total of 65 individuals were reached and declined to participate, 30 individuals were not reached, and for two individuals no caregiver could be identified to accompany the in-principle-interested participant to a near-term on-site visit. This resulted in a total of 43 FG participants (40% of the 108 reached and eligible) for whom a study visit at the UEF-BRU was scheduled. A total of 27 on-site visits were performed in November and December 2021. The initial plan to continue recruitment of this particularly vulnerable population until the end of February 2022 was discontinued after the majority of scheduled visits were canceled at the peak of a SARS-Cov2 outbreak in Finland in early 2022. With this, 63% (27/43) of the scheduled participants came to study visit and the participation rate of this first FG clinical recall study was 19% (27/140) when considering the entire *a-priori* eligible and re-contactable cohort, but it likely would have been substantially higher if all scheduled study visits could have been completed in 2021.

### Registry diagnoses and hospital records are largely consistent

Of the 27 FG participants included in the study, 13 were females (**Table 1**). The mean age at study visit was 73 (58-87) years. Based on FG registry data, 15 study participants had a diagnosis of AD, while 12 participants had been diagnosed with MCD. Mean age at the first diagnostic entry of either AD or MCD was 69 (50-81) and 69 (58-80), respectively, with the mean time since diagnosis being 4 (1-13) years for AD and 3 (1-6) years for the MCD patients under study. Based on these measures, our subcohort was largely representative of the broader FG AD and MCD populations (<http://risteys.finngen.fi/>).

For all participants, the dates of diagnosis between FG registry entry and hospital records were within a six-month range. For one participant, F06.7 was only documented in registry, but not in hospital records. According to hospital memory clinic records, only a single patient had progressed to AD



from an initial diagnosis of MCD. For the majority of the MCD group, clinical interpretation of the hospital records could pinpoint at least one alternative etiology explaining the mild cognitive impairment. This included one case with vascular cognitive impairment, one with cortico-basal degeneration and one with idiopathic normal pressure hydrocephalus. Other putative reasons for MCD included Parkinson's disease, depression, epilepsy, menopause, sleeping problems, or tiredness due to poor overall health. Conversely, for 13 of the 15 patients in the AD group, the clinical diagnosis had been based on current Finnish diagnostic guidelines for memory disorders (20), which included administration of a formal neuropsychological testing battery (CERAD-NB or comprehensive neuropsychological assessment), brain imaging with magnetic resonance imaging or computed tomography, thorough neurological and physical examination as well as in several cases cerebrospinal fluid biomarkers and brain positron emission tomography. Two participants in the AD group did not have diagnostic information in hospital records. For these cases, the validity of a prior diagnosis of AD could not be confirmed. Three had documentation for mixed AD: in one case AD presented together with vascular dementia features, in another AD was documented together with Lewy-Body dementia, and one case was documented to have a posterior variant of AD.

### **In-person, computerized and telephone-administered assessment of cognition**

Data acquisition via all three platforms was in general feasible for participants, with no substantial differences between the AD and MCD groups, although several individuals from both groups were unable to complete specific subtests. Most problems occurred with the computerized versions of TMT-A and TMT-B which were completed by only 17 participants.

In-person MMSE scores could be obtained from 26 participants. Of these, 17 (8AD/9MCD) showed normal cognitive function or only mild impairment ( $MMSE \geq 25$ ), while 9 (6AD/3MCD) were classified as cognitively impaired ( $MMSE < 25$ ). Although the mean MMSE scores did not differentiate between AD ( $24.0 \pm 7.6$ ) and MCD ( $24.1 \pm 6.7$ ) groups ( $p=0.977$ , **Table 1**), there were more cognitively impaired individuals in the AD group (43%, 6/14 versus 25%, 3/12 for MCD). According to TELE, 16 participants (8AD/8MCD) were classified as cognitively healthy (cut-off score  $> 17.5$ ), while 7 (5AD/2MCD) participants were classified as cognitively impaired (cut-off score  $< 16$ ), and 4 (2AD/2MCD) participants ranked between the cut-off scores ( $< 17.6$  and  $\geq 16$ ). On average those with AD ( $15.3 \pm 4.9$ ) had non-significantly ( $p=0.345$ ) lower scores than those with MCD ( $17.2 \pm 4.9$ ). The prevalence of cognitively impaired was almost double in the AD group (33%, 5/15) than in the MCD group (17%, 2/12).

Based on CERAD-NB word list immediate recall, 71% (10/14) of those with AD and 50% (6/12) of those with MCD were classified as having episodic memory impairment (cut-off  $< 17$ ), with mean immediate recall scores of  $14.6 \pm 6.6$  and  $15.2 \pm 6.0$  in AD and MCD subgroups, respectively ( $p=0.812$ ). Based on the CERAD-NB word list delayed recall, 57% (8/14) of those with AD and 33% (4/12) of those with MCD were classified as having episodic memory impairment (cut-off  $< 5$ ), with mean scores of  $4.0 \pm 2.8$  and  $5.0 \pm 2.4$  in AD and MCI subgroups, respectively ( $p=0.343$ ).

Continuous MMSE and TELE scores showed a high correlation of  $r=0.818$  ( $p<0.001$ ) (**Figure 3a**, **Table 1**). A similar high correlation was observed for semantic fluency as measured by in-person

testing as well as a part of the telephone interview ( $r=0.764$ ;  $p<0.001$ ; **Figure 3b**). Considering measures of episodic memory, immediate word recall measures were positively correlated between all three platforms (all  $r's \geq 0.584$ ;  $p's \leq 0.002$ ). Correlations between delayed word recall measures were smaller, with CERAD-NB showing modest correlations with cCOG ( $r=0.390$ ,  $p=0.049$ ) and TICS-m ( $r=0.424$ ,  $p=0.031$ ) whereas the correlation between cCOG and TICS-m measures was small ( $r=0.250$ ,  $p=0.218$ ) (**Figure 3c**). Strong correlations were observed between in-person and computerized measures of executive function (TMT-B;  $r=0.689$ ,  $p=0.004$ ,  $n=15$ ;  $r=0.536$ ,  $p=0.089$ ,  $n=11$  after adjusting for TMT-A and  $r=0.62$ ,  $p=0.054$ ,  $n=10$  after additional exclusion of TMT-A outliers), whereas in-person versus computerized measures of processing speed correlation was moderate (TMT-A;  $r=0.360$ ,  $p=0.171$ ,  $n=16$ ) (**Figure 3d**).

### **Blood-based biomarkers and APOE genotype**

Across all blood-based biomarker parameters, values varied substantially (**Table 2**). Notably, despite the small cohort size we observed statistically significant differences between the AD and MCD groups for GFAP [ $p=0.002$ ; AD: 216.3 (57.5-433.7) pg/ml versus MCD: 102.8 (30.5-161.3) pg/ml] and pTau-181 [ $p=0.020$ ; AD: 3.8 (1.2-11.7) pg/ml versus MCD: 1.9 (0.6-3.6) pg/ml], whereas no significant differences were seen for A $\beta$ 42/40-ratio ( $p=0.266$ ) or NfL ( $p=0.140$ ). TELE total score was significantly correlated with GFAP ( $p=0.011$ ), NfL ( $p=0.001$ ) and pTau-181 ( $p=0.006$ ), but not with A $\beta$ 42/40 ( $p=0.345$ ), whereas non-significant correlations of MMSE score with biomarkers ranged from -0.247 to 0.020. With the exception of correlations between pTau-181 levels and telephone-administered immediate recall of the word list ( $r=-0.394$ ,  $p=0.042$ ,  $n=27$ ) and in-person administered TMT-A ( $r=0.435$ ,  $p=0.034$ ,  $n=24$ ) no other correlations between biomarkers and cognitive performance measures reached statistical significance threshold.

APOE status was available for 23 participants. Of these 13 were APOE  $\epsilon$ 4-carriers (12 heterozygotes, 1 homozygote). There were 71% (10/14) and 33% (3/9) APOE  $\epsilon$ 4-carriers ( $p=0.072$ ) in the AD and MCD groups, respectively ( $p=0.072$  for the difference).

## DISCUSSION

In this single-center, cross-sectional pilot study we ascertained clinical-grade cognitive function and biomarker data from a pre-specified FG subcohort in order to build a framework to operationalize future clinical recall studies from FG. We demonstrated through targeted re-contacting of a FG subcohort with a registry-based diagnosis of AD or MCD that in our recall setting cognitive testing can be performed through on-site clinical examination, a customized web-based tool, or remotely through phone interview, and that measures of episodic memory, executive function and verbal fluency correlate across all three platforms. We further showed a high level of overlap between FG registry data and hospital records and further validate the diagnosis AD versus MCD by determining blood-based AD biomarkers from freshly acquired blood samples.

Enabling recall of biobank participants for clinical follow-up studies is a new frontier for biobank research and considered as of substantial potential across academic and industry stakeholders. In fact, it has been suggested that the “bottom-up” targeted recruitment of individuals with distinct systematically-acquired biomolecular findings is likely to substantially accelerate the speed to validate the relevance of human genetic variation for disease (22), or to generate functional insights on genetic discoveries. A few studies have given a glimpse on the potential of this approach. For instance, an earlier study in Finland in relatives of rare-variant carriers identified through population-level sequencing could substantiate the role of *SLC30A8* in insulin secretion and a Finn-enriched loss-of-function variant in that gene as protective for diabetes (23). Other examples include recall studies in the Estonian Biobank or East London Genes and Health that guided medical interventions (24) or informed transition of an early-stage rare disease therapeutic program towards the clinics (25). Recall studies from population biobanks also hold considerable promise to improve clinical development of precision medicine drugs. Currently, a large fraction of interventional studies fail projected enrollment timelines, a challenge that could potentially be overcome through targeted outreach towards distinct, well-characterized subsets of population biobank participants with the highest projected probability to qualify for and benefit from inclusion into a clinical trial (26). Despite such promises, numerous scientific, operational, and ethical challenges exist to firmly integrate biobank recall studies into the mainstream research, some of which impacted also to our study.

The more than 11,000 FG participants with a probable diagnosis AD at start of our study represent about 8% of prevalent dementia and AD cases in Finland (20). As a research cohort, these individuals already contributed to improve the understanding of the genetic etiology of AD (27,28). Utilizing research data from this cohort for a clinical recall study required thorough collaboration between the study investigators and BEF over a period of nearly two years from first contact to study completion. Specifically, a process needed to be developed that could in principle serve as a template for any future sample or clinical recall study from FG and the Finnish biobanks. Also, in accordance with the Finnish legislation, potential privacy concerns were mitigated by conducting all analyses in a secure compute environment, establishing recontact only through eligible biobank personnel, informing FG participants about their right to opt-out of continued use of their personal data for secondary use in research, and returning all results generated as part of a recall study to the respective biobank and FG for long-term storage and eventual public release.

While the sample size of our pilot recall study is too small for extrapolations to the entire FG population, it still speaks to the strength of the Finnish biobank system that for 93% (140/150) of the consented and targeted FG participants contact details were available, that 78% (110/140) could be reached through mail and recruitment calls within a period of less than three weeks, and that 30% (43/140) of patients and caregivers were in principle willing to enroll in the study. With 19% of contacted participants completing the study protocol, the final participation rate was in a similar range as that of an earlier questionnaire study where we had approached FG participants to provide cognitive, behavioral and lifestyle information via an online platform (29), despite our current study targeting an aged and diseased population with a high vulnerability to a concomitantly ravaging SARS-Cov2 outbreak. It can be expected that future observational studies from FG will yield higher enrollment rates by targeting a younger and healthier study population over an extended period of time and by returning information that can lead to impactful health and lifestyle changes.

Registry data proved to be highly consistent with hospital records in our study population, indicating that clinical data captured in FG may in general be reliable and reproducible. As expected, however, registry data did not have the granularity to differentiate distinct courses of AD present among the trial participants. Another notable insight was that in only one of the 12 participants with ICD code F06.7 the mild cognitive disorder was attributable to AD. Researchers often consider mild cognitive impairment as a transitory phase from normal cognition to AD if no other obvious reasons for the cognitive deficits can be identified. We note that, while considered a proxy endpoint, F06.7 subsumes a broader disease spectrum than the mild cognitive impairment as defined in the National Institute on Aging – Alzheimer’s Association guidelines (30). In fact, our results propose that Finnish clinicians use this code to document the presence of cognitive impairment as part of medical conditions other than AD, reflected by eight different probable underlying conditions among the 12 individuals in the MCD subgroup. Our findings thus clearly advise against using F06.7 as a code with the aim to identify early or pre-symptomatic AD patients from a biobank cohort.

For participants who completed the cognitive assessments via in-person, computerized and telephone-based testing, we observed a high correlation between MMSE and TELE. This is consistent with a previous study in Finnish patients with AD and healthy controls (17). In comparison to MMSE and TELE, the CERAD-NB word list cut-off for immediate and delayed recall identified higher numbers of cognitively impaired individuals in both subgroups, emphasizing that studies like ours benefit from including more specific memory measures rather than simply relying on short screening instruments. Moderate to strong correlations between in-person (CERAD-NB) and computerized (cCOG) measures of immediate and delayed recall are in line with earlier studies comparing computerized/web-based versus in-person neuropsychological tests (14, 31–34). We also observed moderate to strong correlations between telephone-administered and in-person episodic memory measures. To our knowledge, our study is the first to use three learning trials of the 10-word list learning task included in the TICS-m. Thus, our telephone-based episodic memory measures closely corresponded to in-person word-list episodic memory measures. The lowest correlations between episodic memory measures were between TICS-m and cCOG word list measures: this could result from the fact these measures are based solely on verbal versus visual stimuli, respectively, whereas CERAD-NB word list includes both, visual and verbal stimuli. Based on the substantial inter-platform

variability we observed in our study, future studies should be advised to assess episodic memory with more than a single test.

We observed significant associations between cCOG and in-person measures also for other cognitive domains. Processing speed, as assessed by TMT-A, showed a moderate association between in-person and cCOG assessment after exclusion of outliers. For TMT-B, measuring set-shifting, one of the core executive functions, showed a strong correlation between cCOG and in-person testing, which remained after accounting for processing speed and exclusion of outliers from TMT-A. These results are consistent with earlier findings (14). However, given that a sizable fraction of participants was unable to complete the task, computer-based administration of TMT-A/B in an unfamiliar environment on site may be considered as too difficult for individuals with manifest AD or MCD. Notably though, we observed a strong association between in-person and telephone administered semantic fluency. Due to the fact that the 1-minute animal naming was identical in both formats, this measure represented the strongest correlation among the measures of specific cognitive abilities. We are not aware of any other studies that have examined the association between in-person and telephone administered semantic fluency.

Despite the small size of our study, plasma levels of GFAP and pTau-181 were significantly different between the AD and MCD groups, which further supports the potential of these measures as diagnostic biomarkers for AD (35). Conversely, no such differentiation was seen for A $\beta$ 42/40 ratio and NfL. Our results thus back recent findings that among the four plasma parameters pTau-181 might be the strongest differentiator of AD from non-AD patients (36), which will need to be further validated at larger sample sizes. Larger studies will also be needed to thoroughly compare blood-based AD biomarker levels to cognitive performance. Notably, however, already in our current study we observed negative associations of TELE total score with GFAP, NfL, and pTau-181 levels, yet not with A $\beta$ 42/40 ratio. According to the expectations, there was a trend towards more *APOE*  $\epsilon$ 4-carriers in the AD group than in the MCD group, with the prevalence of  $\epsilon$ 4-carriers in the MCD group closely matching to the prevalence of over 30% in the Finnish population (21).

Our study has several limitations: First, we invited participants from just a single of the nine Finnish biobanks contributing to FG and focused recruitment on a relatively uniform cohort in geographic proximity to the single study center. Follow-up studies that aim for a larger and more diverse study population will certainly face additional complexities, not the least with regards to harmonizing re-contacting, consenting, and contracting activities between multiple parties. It can be expected that the establishment of a centralized coordinating unit, such as the Finnish Biobank Cooperative FinBB, will facilitate the navigation through complex administrative processes that have not yet been customized for clinical recall activities in Finland and in our case required an extended period of planning. Second, according to FG records all individuals in our target population had already been diagnosed with either AD or MCD as a reflection of cognitive deficiencies. One of the greatest opportunities of biobank studies is to facilitate contact to individuals early in their disease or at risk, but not yet manifest disease, for instance because they carry genetic variants that without intervention reduce lifespan (8,37,38). In fact, enrolling sufficient “trial-ready” minimally symptomatic AD

patients into interventional trials often takes several years and may contribute substantially to the costs of clinical programs (39).

While FG participants are in principle consented for return of their results, studies in pre- and early-symptomatic individuals will need to carefully walk the fine line between providing useful information to improve a participant's health or lifestyle and disclosing potentially unwanted and uncertain research information (40). The correspondence between measures of cognitive function across different formats used in our study was generally good, we observed substantial variability of cognitive performance among the small number of individuals recalled for our study. This at least in part reflects that a few study participants were substantially further progressed in their disease than others. Further stratification based on available FG data may make future cohorts more homogenous. Also, cognitive function information acquired by phone in general tended to correlate better to in-person tests than information obtained via cCOG in our cohort; this may be due to our sample of individuals with AD having more problems with self-guided computerized tool versus using the phone. Finally, we note that with its small sample size our pilot study was not designed to detect robust statistical differences between measures, so results should be evaluated with caution.

In summary, our study introduces a recall framework to launch clinical studies from FG and the Finnish biobanks. While laborious to operationalize, the opportunity to recontact FG participants based on distinct genetic or phenotypic parameters opens the door for a broad spectrum of scientific activities, ranging from the validation of genetic findings in targeted follow-up experiments to delivering new and emerging precision treatments to individuals with the highest medical needs.

## ACKNOWLEDGEMENTS

We are grateful to the participants of FinnGen and this current study for volunteering their data to research. We further thank Mary Pat Reeve for FinnGen Sandbox look-ups and Huei-Yi Shen for help with contracting. The FinnGen project is funded by two grants from Business Finland (HUS 4685/31/2016 and UH 4386/31/2016) and the following industry partners: AbbVie, AstraZeneca UK, Biogen, Bristol Myers Squibb (and Celgene Corporation & Celgene International II), Genentech, Merck Sharp & Dohme LLC, a subsidiary of Merck & Co., Inc., Rahway, NJ, USA, Pfizer, GlaxoSmithKline Intellectual Property Development, Sanofi US Services, Maze Therapeutics, Janssen Biotech, Novartis, and Boehringer Ingelheim. The following biobanks are acknowledged for delivering samples to FinnGen: Auria Biobank (<https://www.auria.fi/biopankki/>), THL Biobank (<https://www.thl.fi/biobank>), Helsinki Biobank (<https://www.helsinginbiopankki.fi>), Biobank Borealis of Northern Finland (<https://www.ppsHP.fi/Tutkimus-ja-opetus/Biopankki/Pages/Biobank-Borealis-briefly-in-English.aspx>), Finnish Clinical Biobank Tampere ([https://www.tays.fi/en-US/Research\\_and\\_development/Finnish\\_Clinical\\_Biobank\\_Tampere](https://www.tays.fi/en-US/Research_and_development/Finnish_Clinical_Biobank_Tampere)), Biobank of Eastern Finland (<https://www.ita-suomenbiopankki.fi/en>), Central Finland Biobank (<https://www.ksshP.fi/fi-FI/Potilaalle/Biopankki>), Finnish Red Cross Blood Service Biobank ([www.veripalvelu.fi/verenluovutus/biopankkitoiminta](http://www.veripalvelu.fi/verenluovutus/biopankkitoiminta)) and Terveystalo Biobank (<https://www.terveystalo.com/fi/Yritystietoa/Terveystalo-Biopankki/Biopankki/>). All Finnish biobanks are members of the BBMRI.fi infrastructure (<https://www.bbmri.fi>). The FINBB

(<https://finbb.fi/>) is the coordinator of BBMRI-ERIC operations in Finland. The Finnish biobank data can be accessed through the Fingenious services (<https://site.fingenious.fi/en/>) managed by FINBB. We acknowledge the BBMRI.fi for creating the original biobank map used in Fig. 1a and providing us their permission to use it. Further funding to EV came from the Academy of Finland grants 314639 and 320109.

The FinnGen study is approved by Finnish Institute for Health and Welfare (permit numbers: THL/2031/6.02.00/2017, THL/1101/5.05.00/2017, THL/341/6.02.00/2018, THL/2222/6.02.00/2018, THL/283/6.02.00/2019, THL/1721/5.05.00/2019 and THL/1524/5.05.00/2020), Digital and population data service agency (permit numbers: VRK43431/2017-3, VRK/6909/2018-3, VRK/4415/2019-3), the Social Insurance Institution (permit numbers: KELA 58/522/2017, KELA 131/522/2018, KELA 70/522/2019, KELA 98/522/2019, KELA 134/522/2019, KELA 138/522/2019, KELA 2/522/2020, KELA 16/522/2020), Findata permit numbers THL/2364/14.02/2020, THL/4055/14.06.00/2020, THL/3433/14.06.00/2020, THL/4432/14.06/2020, THL/5189/14.06/2020, THL/5894/14.06.00/2020, THL/6619/14.06.00/2020, THL/209/14.06.00/2021, THL/688/14.06.00/2021, THL/1284/14.06.00/2021, THL/1965/14.06.00/2021, THL/5546/14.02.00/2020, THL/2658/14.06.00/2021, THL/4235/14.06.00/202, Statistics Finland (permit numbers: TK-53-1041-17 and TK/143/07.03.00/2020 (earlier TK-53-90-20) TK/1735/07.03.00/2021, TK/3112/07.03.00/2021) and Finnish Registry for Kidney Diseases permission/extract from the meeting minutes on 4th July 2019. The Biobank Access Decisions for FinnGen samples and data utilized in FinnGen Data Freeze 9 include: THL Biobank BB2017\_55, BB2017\_111, BB2018\_19, BB\_2018\_34, BB\_2018\_67, BB2018\_71, BB2019\_7, BB2019\_8, BB2019\_26, BB2020\_1, Finnish Red Cross Blood Service Biobank 7.12.2017, Helsinki Biobank HUS/359/2017, HUS/248/2020, Auria Biobank AB17-5154 and amendment #1 (August 17 2020), AB20-5926 and amendment #1 (April 23 2020) and it's modification (Sep 22 2021), Biobank Borealis of Northern Finland\_2017\_1013, Biobank of Eastern Finland 1186/2018 and amendment 22 § /2020, Finnish Clinical Biobank Tampere MH0004 and amendments (21.02.2020 & 06.10.2020), Central Finland Biobank 1-2017, and Terveystalo Biobank STB 2018001 and amendment 25th Aug.

## **AUTHOR CONTRIBUTIONS**

V.J., E.V. and H.R. conceptualized and oversaw the study; V.J., C.S. and E.V. conducted statistical analyses; V.J., J.K., M.H., A.-K.P., A.M., H.K., T.L., V.-M.K., T.I.P., R.K., M.H., S.-K.H., S.K., T.K., M.U., obtained or contributed data or facilitated interactions at participating institutions; M.P. and A.P. consulted on the study protocol and enabled governance interactions; V.J., C.S., E.V. and H.R. wrote and edited the study protocol and manuscript

## **CONFLICTS**

H.R. is a full-time employee of Biogen. A.P. is a member of the Pfizer Genetics Scientific Advisory Panel.

## FIGURE LEGENDS

**Figure 1 a) Screening and enrollment process for study.** AD, Alzheimer’s disease; MCD, mild-cognitive disorder; UEF, University of eastern Finland. **b) New data acquired during study.** CERAD-NB, Consortium to Establish a Registry for Alzheimer’s Disease Neuropsychological Battery; WMS, Wechsler Logical Memory Scale; TMT-A/B, Trail Making Test parts A and B; CDR, clinical dementia rating scale; CDR-SB, CDR sum of boxes; ADCS-ADL, Alzheimer’s Disease Cooperative Study – Activities of Daily Living scale; TELE, telephone assessment for dementia; TICS-m, modified Telephone Interview for Cognitive Status; Abeta-42/40, amyloid beta (A $\beta$ )1-42/1-40; p-Tau181, phosphorylated-tau181; NFL, neurofilament light chain; GFAP, glial fibrillary acidic protein;

**Figure 2 Operationalization of this clinical recall study from FinnGen.** CDA, confidentiality agreement; MSA, master services agreement; IRB, institutional review board; DPIA, data protection impact assessment; BB, biobank; MTA, material transfer agreement

**Figure 3 Comparison of cognitive testing results across the three platforms utilized in the study.** Correlations of **a)** memory, **b)** semantic fluency, **c)** immediate and delayed recall, and **d)** executive function are presented between in-person, computerized, and telephone-based assessments. Scatterplots with 95% confidence intervals (shaded areas) display correlation coefficient  $r$  and  $p$ -value from Spearman’s rank partial correlation analyses. cCOG, computerized cognitive testing; CERAD-NB, Consortium to Establish a Registry for Alzheimer’s Disease Neuropsychological Battery; MMSE, Mini Mental State Examination; TELE, Telephone assessment for dementia; TICS-m, modified Telephone Interview for Cognitive Status with three learning trials of the 10-word list; TMT-A/B, Trail Making Test parts A and B.



## REFERENCES

1. Brookmeyer R, Johnson E, Ziegler-Graham K, Arrighi HM. Forecasting the global burden of Alzheimer's disease. *Alzheimers Dement J Alzheimers Assoc.* 2007;3(3):186–91.
2. Cummings JL, Doody R, Clark C. Disease-modifying therapies for Alzheimer disease: challenges to early intervention. *Neurology.* 2007;69(16):1622–34.
3. Collins R, Balaconis MK, Brunak S, Chen Z, De Silva M, Gaziano JM, et al. Global priorities for large-scale biomarker-based prospective cohorts. *Cell Genomics.* 2022;2(6):100141.
4. Zhou W, Kanai M, Wu KHH, Rasheed H, Tsuo K, Hirbo JB, ym. Global Biobank Meta-analysis Initiative: Powering genetic discovery across human disease. *Cell Genomics.* 2022;2(10):100192.
5. Abul-Husn NS, Kenny EE. Personalized Medicine and the Power of Electronic Health Records. *Cell.* 2019;177(1):58–69.
6. Zeggini E, Gloyn AL, Barton AC, Wain LV. Translational genomics and precision medicine: Moving from the lab to the clinic. *Science.* 2019;365(6460):1409–13.
7. Corbin LJ, Tan VY, Hughes DA, Wade KH, Paul DS, Tansey KE, ym. Formalising recall by genotype as an efficient approach to detailed phenotyping and causal inference. *Nat Commun.* 2018;9(1):711.
8. Sun BB, Kurki MI, Foley CN, Mechakra A, Chen CY, Marshall E, et al. Genetic associations of protein-coding variants in human disease. *Nature.* 2022;603(7899):95–102.
9. Kurki MI, Karjalainen J, Palta P, Sipilä TP, Kristiansson K, Donner K, et al. FinnGen provides genetic insights from a well-phenotyped isolated population. *Nature.* 2023;613(7944):508-518.
10. Morris JC, Edland S, Clark C, Galasko D, Koss E, Mohs R, et al. The consortium to establish a registry for Alzheimer's disease (CERAD). Part IV. Rates of cognitive change in the longitudinal assessment of probable Alzheimer's disease. *Neurology.* 1993;43(12):2457–65.
11. Wechsler, David. WMS-III - Wechsler Memory Scale - 3rd ed. Psykol Kust Oy Hels. 2008.
12. REITAN RM. The relation of the trail making test to organic brain damage. *J Consult Psychol.* 1955;19(5):393–4.
13. Golden C. Stroop Color and Word Test: A Manual for Clinical and Experimental Uses. 1978. Skoelting: Chicago, IL, USA.
14. Rhodius-Meester HFM, Paaanen T, Koikkalainen J, Mahdiani S, Bruun M, Baroni M, et al. cCOG: A web-based cognitive test tool for detecting neurodegenerative disorders. *Alzheimers Dement Amst Neth.* 2020;12(1):e12083.
15. Gatz M, Reynolds CA, John R, Johansson B, Mortimer JA, Pedersen NL. Telephone screening to identify potential dementia cases in a population-based sample of older adults. *Int Psychogeriatr.* 2002;14(3):273–89.
16. Brandt J, Spencer M, Folstein M. The telephone interview for cognitive status. *Cogn Behav Neurol.* 1988;1(2):111–7.

17. Järvenpää T, Rinne JO, Riihinen I, Koskenvuo M, Löppönen M, Hinkka S, et al. Characteristics of two telephone screens for cognitive impairment. *Dement Geriatr Cogn Disord*. 2002;13(3):149–55.
18. Morris JC. The Clinical Dementia Rating (CDR): current version and scoring rules. *Neurology*. 1993;43(11):2412–4.
19. Pedrosa H, De Sa A, Guerreiro M, Maroco J, Simoes MR, Galasko D, et al. Functional evaluation distinguishes MCI patients from healthy elderly people--the ADCS/MCI/ADL scale. *J Nutr Health Aging*. 2010;14(8):703–9.
20. Memory Disorders: Current Care Guidelines. Working group set up by the Finnish Medical Society Duodecim, Societas Gerontologica Fennica, Finnish Geriatric Society, Finnish Psychogeriatric Society and Finnish Society of General Practitioners. Updated 29.1.2021. Accessed 15.1.2023. Available at: [www.kaypahoito.fi](http://www.kaypahoito.fi).
21. Vuoksima E, Palviainen T, Lindgren N, Rinne JO, Kaprio J. Accuracy of Imputation for Apolipoprotein E  $\epsilon$  Alleles in Genome-Wide Genotyping Data. *JAMA Netw Open*. 2020;3(1):e1919960.
22. McGuire SE, McGuire AL. Don't throw the baby out with the bathwater: enabling a bottom-up approach in genome-wide association studies. *Genome Res*. 2008;18(11):1683–5.
23. Dwivedi OP, Lehtovirta M, Hastoy B, Chandra V, Krentz NAJ, Kleiner S, et al. Loss of ZnT8 function protects against diabetes by enhanced insulin secretion. *Nat Genet*. 2019;51(11):1596–606.
24. Alver M, Palover M, Saar A, Läll K, Zekavat SM, Tõnisson N, et al. Recall by genotype and cascade screening for familial hypercholesterolemia in a population-based biobank from Estonia. *Genet Med Off J Am Coll Med Genet*. 2019;21(5):1173–80.
25. McGregor TL, Hunt KA, Yee E, Mason D, Nioi P, Ticau S, et al. Characterising a healthy adult with a rare HAO1 knockout to support a therapeutic strategy for primary hyperoxaluria. *eLife*. 2020;9:e54363.
26. Milo Rasouly H, Wynn J, Marasa M, Reingold R, Chatterjee D, Kapoor S, et al. Evaluation of the cost and effectiveness of diverse recruitment methods for a genetic screening study. *Genet Med Off J Am Coll Med Genet*. 2019;21(10):2371–80.
27. Bellenguez C, Küçükali F, Jansen IE, Kleindam L, Moreno-Grau S, Amin N, et al. New insights into the genetic etiology of Alzheimer's disease and related dementias. *Nat Genet*. 2022;54(4):412–36.
28. Lindbohm JV, Mars N, Sipilä PN, Singh-Manoux A, Runz H, Livingston G, et al. Immune system-wide Mendelian randomization and triangulation analyses support autoimmunity as a modifiable component in dementia-causing diseases. *Nat Aging*. 2022;2(10):956–72.
29. Rodosthenous RS, Niemi MEK, Kallio L, Perala M, Terho P, Knopp T, et al. Recontacting biobank participants to collect lifestyle, behavioural and cognitive information via online questionnaires: lessons from a pilot study within FinnGen. *BMJ Open*. 2022;12(10):e064695.

30. Albert MS, DeKosky ST, Dickson D, Dubois B, Feldman HH, Fox NC, et al. The diagnosis of mild cognitive impairment due to Alzheimer's disease: recommendations from the National Institute on Aging-Alzheimer's Association workgroups on diagnostic guidelines for Alzheimer's disease. *Alzheimers Dement*. 2011;7(3):270-9. doi: 10.1016/j.jalz.2011.03.008. Epub 2011 Apr 21.
31. Mielke MM, Machulda MM, Hagen CE, Edwards KK, Roberts RO, Pankratz VS, et al. Performance of the CogState computerized battery in the Mayo Clinic Study on Aging. *Alzheimers Dement J Alzheimers Assoc*. 2015;11(11):1367–76.
32. Morrison GE, Simone CM, Ng NF, Hardy JL. Reliability and validity of the NeuroCognitive Performance Test, a web-based neuropsychological assessment. *Front Psychol*. 2015;6:1652.
33. Smith PJ, Need AC, Cirulli ET, Chiba-Falek O, Attix DK. A comparison of the Cambridge Automated Neuropsychological Test Battery (CANTAB) with "traditional" neuropsychological testing instruments. *J Clin Exp Neuropsychol*. 2013;35(3):319–28.
34. Morrison RL, Pei H, Novak G, Kaufer DI, Welsh-Bohmer KA, Ruhmel S, et al. A computerized, self-administered test of verbal episodic memory in elderly patients with mild cognitive impairment and healthy participants: A randomized, crossover, validation study. *Alzheimers Dement Amst Neth*. 2018;10:647–56.
35. Teunissen CE, Verberk IMW, Thijssen EH, Vermunt L, Hansson O, Zetterberg H, et al. Blood-based biomarkers for Alzheimer's disease: towards clinical implementation. *Lancet Neurol*. 2022;21(1):66–77.
36. Simrén J, Leuzy A, Karikari TK, Hye A, Benedet AL, Lantero-Rodriguez J, et al. The diagnostic and prognostic capabilities of plasma biomarkers in Alzheimer's disease. *Alzheimers Dement J Alzheimers Assoc*. 2021;17(7):1145–56.
37. Mars N, Widén E, Kerminen S, Meretoja T, Pirinen M, Della Briotta Parolo P, et al. The role of polygenic risk and susceptibility genes in breast cancer over the course of life. *Nat Commun*. 2020;11(1):6383.
38. Jukarainen S, Kiiskinen T, Kuitunen S, Havulinna AS, Karjalainen J, Cordioli M, et al. Genetic risk factors have a substantial impact on healthy life years. *Nat Med*. 2022;28(9):1893–901.
39. Aisen PS, Jimenez-Maggiora GA, Rafii MS, Walter S, Raman R. Early-stage Alzheimer disease: getting trial-ready. *Nat Rev Neurol*. 2022;18(7):389–99.
40. Lewis ACF, Knoppers BM, Green RC. An international policy on returning genomic research results. *Genome Med*. 2021;13(1):115.

**Table 1. Characteristics of the study cohort**

|                             | AD (n=15)     | MCD (n=12)   | p-value |
|-----------------------------|---------------|--------------|---------|
| Age, y                      | 73.0<br>(8.8) | 72.5 (8.3)   | 0.895   |
| Sex, females/males [n]      | 8/7           | 5/7          | 0.830   |
| APOE4 carrier [n]           | 10            | 3            | 0.171   |
| MMSE                        | 24.0 (7.6)    | 24.1 (6.7)   | 0.977   |
| <b>In-person tests</b>      |               |              |         |
| CERAD immediate recall      | 14.6 (6.6)    | 15.2 (6.0)   | 0.812   |
| CERAD delayed recall        | 4.0 (2.8)     | 5.0 (2.4)    | 0.343   |
| TMT-A [s]                   | 84.3 (54.2)   | 83.6 (35.0)  | 0.973   |
| TMT-B [s]                   | 178.1 (83.9)  | 215.2 (83.8) | 0.337   |
| Semantic fluency            | 18.1 (7.3)    | 18.0 (8.2)   | 0.963   |
| <b>Computer-based tests</b> |               |              |         |
| cCOG immediate recall       | 13.6 (6.2)    | 12.6 (5.1)   | 0.666   |
| cCOG delayed recall         | 3.5 (3.2)     | 4.1 (2.8)    | 0.632   |
| cCOG TMT-A modified [s]     | 98.8 (74.1)   | 81.1 (33.6)  | 0.567   |
| cCOG TMT-B modified [s]     | 231.6 (87.4)  | 261.0 (91.6) | 0.525   |
| <b>Phone-based tests</b>    |               |              |         |
| TELE total                  | 15.3 (4.9)    | 17.2 (4.9)   | 0.346   |
| TICS-m immediate recall     | 14.5 (9.6)    | 14.2 (6.6)   | 0.927   |
| TICS-m delayed recall       | 3.8 (4.0)     | 2.6 (2.4)    | 0.365   |
| Semantic fluency            | 15.1 (6.8)    | 17.2 (6.7)   | 0.446   |

Data are given as mean and standard deviation for Alzheimer's disease (AD) and mild cognitive disorder (MCD) groups separately. *APOE4* carrier status was available for 23 (14AD/9MCD) and MMSE, CERAD immediate and delayed recall, cCOG immediate and delayed recall, and in-person verbal fluency data was available for 26 (14AD/12MCD) participants. In-person TMT-A was available for 25 (14AD/11MCD), in-person TMT-B for 20 (11AD/9MCD), cCOG TMT-A for 17 (10AD/7MCD), and cCOG TMT-B for 17 (11AD/6MCD) participants. APOE, Apolipoprotein E, cCOG, computerized cognitive testing; CERAD, Consortium to Establish a Registry for Alzheimer's Disease; MMSE, Mini Mental State Examination; TELE, Telephone assessment for dementia; TICS-m, modified Telephone Interview for Cognitive Status with three learning trials of the 10-word list; TMT-A/B, Trail Making Test parts A and B.

**Table 2. Blood-based biomarkers in study participants with Alzheimer’s disease (AD) and mild cognitive disorder (MCD) diagnosis and correlations with cognitive measures**

|                                                                                | Aβ42/40                        | GFAP (pg/ml)                          | NfL (pg/ml)                | pTau-181 (pg/ml)                |
|--------------------------------------------------------------------------------|--------------------------------|---------------------------------------|----------------------------|---------------------------------|
| AD (n=15), Mean (SD) & range                                                   | 0.055 (.009)<br>0.035 – 0.071  | <b>216.3* (107.7)</b><br>57.5 – 433.7 | 24.6 (15.3)<br>11.2 – 73.8 | <b>3.8* (2.6)</b><br>1.2 – 11.7 |
| MCD (n=12), Mean (SD) & range                                                  | 0.059 (0.011)<br>0.031 – 0.072 | <b>102.8 (39.8)</b><br>30.5 – 161.3   | 17.3 (7.4)<br>9.2 – 28.1   | <b>1.9 (0.9)</b><br>0.6 – 3.6   |
| r (p-value) with cognitive screening instruments                               |                                |                                       |                            |                                 |
| MMSE (n=26)                                                                    | 0.020 (0.923)                  | -0.146 (0.476)                        | -0.220 (0.280)             | -0.247 (0.223)                  |
| TELE (n=27)                                                                    | 0.189 (0.345)                  | <b>-0.480 (0.011)</b>                 | <b>-0.587 (0.001)</b>      | <b>-0.511 (0.006)</b>           |
| r (p-value) with episodic memory tests (immediate and delayed recall measures) |                                |                                       |                            |                                 |
| CERAD immediate (n=26)                                                         | 0.156 (0.446)                  | -0.149 (0.468)                        | -0.327 (0.103)             | -0.202 (0.322)                  |
| CERAD delayed (n=26)                                                           | 0.323 (0.108)                  | -0.211 (0.300)                        | -0.190 (0.353)             | -0.254 (0.210)                  |
| cCOG immediate (n=26)                                                          | 0.064 (0.757)                  | -0.178 (0.383)                        | -0.259 (0.202)             | -0.222 (0.276)                  |
| cCOG delayed (n=26)                                                            | 0.195 (0.341)                  | -0.338 (0.091)                        | -0.177 (0.387)             | -0.300 (0.136)                  |
| TICS-m immediate (n=27)                                                        | 0.051 (0.802)                  | -0.172 (0.392)                        | -0.280 (0.158)             | <b>-0.394 (0.042)</b>           |
| TICS-m delayed (n=27)                                                          | -0.002 (0.994)                 | -0.091 (0.650)                        | -0.108 (0.592)             | -0.300 (0.129)                  |
| r (p-value) with processing speed                                              |                                |                                       |                            |                                 |
| TMT-A (n=24)                                                                   | 0.044 (0.837)                  | 0.281 (0.184)                         | 0.344 (0.099)              | <b>0.435 (0.034)</b>            |
| cCOG TMT-A modified (n=15)                                                     | 0.233 (0.404)                  | 0.020 (0.945)                         | 0.118 (0.675)              | 0.245 (0.379)                   |
| r (p-value) with set-shifting (adjusted for processing speed)                  |                                |                                       |                            |                                 |
| TMT-B (n=20)                                                                   | -0.198 (0.402)                 | 0.125 (0.600)                         | 0.095 (0.691)              | 0.095 (0.691)                   |
| cCOG TMT-B modified (n=11)                                                     | -0.118 (0.729)                 | -0.264 (0.433)                        | -0.327 (0.326)             | -0.018 (0.958)                  |
| r (p-value) with semantic fluency (SF)                                         |                                |                                       |                            |                                 |
| SF in-person (n=26)                                                            | 0.031 (0.880)                  | -0.072 (0.727)                        | -0.302 (0.134)             | -0.088 (0.668)                  |
| SF telephone (n=27)                                                            | 0.188 (0.348)                  | -0.171 (0.395)                        | -0.324 (0.100)             | -0.281 (0.156)                  |

\* Significantly higher value in AD group in comparison to MCD group. Participants with >200 in TMT-A (modified) were excluded from the processing speed and set-shifting correlations. AD, Alzheimer’s disease; Aβ42/40, amyloid beta

42/40 ratio; cCOG, computerized cognitive testing; CERAD, Consortium to Establish a Registry for Alzheimer's Disease; GFAP, glial fibrillary acidic protein; MCD, mild cognitive impairment; MMSE, Mini Mental State Examination; NfL, neurofilament light chain; pTau-181, phosphorylated-tau181; TELE, Telephone assessment for dementia; TICS-m, modified Telephone Interview for Cognitive Status with three learning trials of the 10-word list; SD, standard deviation; TMT-A/B, Trail Making Test parts A and B; VF, verbal fluency.

## FinnGen Collaborators

| Full Name              | Affiliation                                                                                                                                                            | E-mail                                          | Role 1             | Role 2                   |
|------------------------|------------------------------------------------------------------------------------------------------------------------------------------------------------------------|-------------------------------------------------|--------------------|--------------------------|
| Aarno Palotie          | Institute for Molecular Medicine Finland (FIMM), HiLIFE, University of Helsinki, Helsinki, Finland; Broad Institute of MIT and Harvard; Massachusetts General Hospital | aarno.palotie@helsinki.fi                       | Steering Committee | Steering Committee       |
| Mark Daly              | Institute for Molecular Medicine Finland (FIMM), HiLIFE, University of Helsinki, Helsinki, Finland; Broad Institute of MIT and Harvard; Massachusetts General Hospital | mark.daly@helsinki.fi                           | Steering Committee | Steering Committee       |
| Bridget Riley-Gills    | Abbvie, Chicago, IL, United States                                                                                                                                     | bridget.rileygillis@abbvie.com                  | Steering Committee | Pharmaceutical companies |
| Howard Jacob           | Abbvie, Chicago, IL, United States                                                                                                                                     | howard.jacob@abbvie.com                         | Steering Committee | Pharmaceutical companies |
| Dirk Paul              | Astra Zeneca, Cambridge, United Kingdom                                                                                                                                | dirk.paul@astrazeneca.com                       | Steering Committee | Pharmaceutical companies |
| Athena Matakidou       | Astra Zeneca, Cambridge, United Kingdom                                                                                                                                | athena.x.matakidou@gsk.com                      | Steering Committee | Pharmaceutical companies |
| Adam Platt             | Astra Zeneca, Cambridge, United Kingdom                                                                                                                                | adam.platt@astrazeneca.com                      | Steering Committee | Pharmaceutical companies |
| Heiko Runz             | Biogen, Cambridge, MA, United States                                                                                                                                   | heiko.runz@biogen.com                           | Steering Committee | Pharmaceutical companies |
| Sally John             | Biogen, Cambridge, MA, United States                                                                                                                                   | sally.john@biogen.com                           | Steering Committee | Pharmaceutical companies |
| George Okafo           | Boehringer Ingelheim, Ingelheim am Rhein, Germany                                                                                                                      | george.okafo@boehringer-ingelheim.com           | Steering Committee | Pharmaceutical companies |
| Nathan Lawless         | Boehringer Ingelheim, Ingelheim am Rhein, Germany                                                                                                                      | nathan.lawless@boehringer-ingelheim.com         | Steering Committee | Pharmaceutical companies |
| Heli Salminen-Mankonen | Boehringer Ingelheim, Ingelheim am Rhein, Germany                                                                                                                      | heli.salminen-mankonen@boehringer-ingelheim.com | Steering Committee | Pharmaceutical companies |
| Robert Plenge          | Bristol Myers Squibb, New York, NY, United States                                                                                                                      | robert.plenge@bms.com                           | Steering Committee | Pharmaceutical companies |
| Joseph Maranville      | Bristol Myers Squibb, New York, NY, United States                                                                                                                      | joseph.maranville@bms.com                       | Steering Committee | Pharmaceutical companies |
| Mark McCarthy          | Genentech, San Francisco, CA, United States                                                                                                                            | mccarthy.mark@gene.com                          | Steering Committee | Pharmaceutical companies |
| Julie Hunkapiller      | Genentech, San Francisco, CA, United States                                                                                                                            | hunkapiller.julie@gene.com                      | Steering Committee | Pharmaceutical companies |
| Margaret G. Ehm        | GlaxoSmithKline, Collegeville, PA, United States                                                                                                                       | meg.g.ehm@gsk.com                               | Steering Committee | Pharmaceutical companies |
| Kirsi Auro             | GlaxoSmithKline, Espoo, Finland                                                                                                                                        | kirsi.m.auro@gsk.com                            | Steering Committee | Pharmaceutical companies |
| Simonne Longerich      | Merck, Kenilworth, NJ, United States                                                                                                                                   | simonne.longerich@merck.com                     | Steering Committee | Pharmaceutical companies |
| Caroline Fox           | Merck, Kenilworth, NJ, United States                                                                                                                                   | caroline.fox@merck.com                          | Steering Committee | Pharmaceutical companies |
| Anders Målarstig       | Pfizer, New York, NY, United States                                                                                                                                    | anders.malarstig@pfizer.com                     | Steering Committee | Pharmaceutical companies |
| Katherine Klinger      | Translational Sciences, Sanofi R&D, Framingham, MA, USA                                                                                                                | katherine.klinger@sanofi.com                    | Steering Committee | Pharmaceutical companies |
| Deepak Rajpal          | Translational Sciences, Sanofi R&D, Framingham, MA, USA                                                                                                                | deepak.rajpal@sanofi.com                        | Steering Committee | Pharmaceutical companies |
| Eric Green             | Maze Therapeutics, San Francisco, CA, United States                                                                                                                    | egreen@mazetx.com                               | Steering Committee | Pharmaceutical companies |

|                      |                                                                                                                 |                                      |                      |                                   |
|----------------------|-----------------------------------------------------------------------------------------------------------------|--------------------------------------|----------------------|-----------------------------------|
| Robert Graham        | Maze Therapeutics, San Francisco, CA, United States                                                             | rgraham@mazetx.com                   | Steering Committee   | Pharmaceutical companies          |
| Robert Yang          | Janssen Biotech, Beerse, Belgium                                                                                | ryang31@its.jnj.com                  | Steering Committee   | Pharmaceutical companies          |
| Chris O'Donnell      | Novartis Institutes for BioMedical Research, Cambridge, MA, United States                                       | chris.odonnell@novartis.com          | Steering Committee   | Pharmaceutical companies          |
| Tomi P. Mäkelä       | HiLIFE, University of Helsinki, Finland, Finland                                                                | tomi.makela@helsinki.fi              | Steering Committee   | University of Helsinki & Biobanks |
| Jaakko Kaprio        | Institute for Molecular Medicine Finland (FIMM), HiLIFE, University of Helsinki, Helsinki, Finland              | jaakko.kaprio@helsinki.fi            | Steering Committee   | University of Helsinki & Biobanks |
| Petri Virolainen     | Auria Biobank / University of Turku / Hospital District of Southwest Finland, Turku, Finland                    | petri.virolainen@tyks.fi             | Steering Committee   | University of Helsinki & Biobanks |
| Antti Hakanen        | Auria Biobank / University of Turku / Hospital District of Southwest Finland, Turku, Finland                    | antti.hakanen@tyks.fi                | Steering Committee   | University of Helsinki & Biobanks |
| Terhi Kilpi          | THL Biobank / Finnish Institute for Health and Welfare (THL), Helsinki, Finland                                 | terhi.kilpi@thl.fi                   | Steering Committee   | University of Helsinki & Biobanks |
| Markus Perola        | THL Biobank / Finnish Institute for Health and Welfare (THL), Helsinki, Finland                                 | markus.perola@thl.fi                 | Steering Committee   | University of Helsinki & Biobanks |
| Jukka Partanen       | Finnish Red Cross Blood Service / Finnish Hematology Registry and Clinical Biobank, Helsinki, Finland           | jukka.partanen@veripalvelu.fi        | Steering Committee   | University of Helsinki & Biobanks |
| Anne Pitkäranta      | Helsinki Biobank / Helsinki University and Hospital District of Helsinki and Uusimaa, Helsinki                  | anne.pitkaranta@hus.fi               | Steering Committee   | University of Helsinki & Biobanks |
| Taneli Raivio        | Helsinki Biobank / Helsinki University and Hospital District of Helsinki and Uusimaa, Helsinki                  | taneli.raivio@hus.fi                 | Steering Committee   | University of Helsinki & Biobanks |
| Raisa Serpi          | Northern Finland Biobank Borealis / University of Oulu / Northern Ostrobothnia Hospital District, Oulu, Finland | raisa.serpi@ppshp.fi                 | Steering Committee   | University of Helsinki & Biobanks |
| Tarja Laitinen       | Finnish Clinical Biobank Tampere / University of Tampere / Pirkanmaa Hospital District, Tampere, Finland        | tarja.laitinen@pshp.fi               | Steering Committee   | University of Helsinki & Biobanks |
| Veli-Matti Kosma     | Biobank of Eastern Finland / University of Eastern Finland / Northern Savo Hospital District, Kuopio, Finland   | veli-matti.kosma@uef.fi              | Steering Committee   | University of Helsinki & Biobanks |
| Jari Laukkanen       | Central Finland Biobank / University of Jyväskylä / Central Finland Health Care District, Jyväskylä, Finland    | jari.laukkanen@ksshp.fi              | Steering Committee   | University of Helsinki & Biobanks |
| Marco Hautalahti     | FINBB - Finnish biobank cooperative                                                                             | marco.hautalahti@finbb.fi            | Steering Committee   | University of Helsinki & Biobanks |
| Outi Tuovila         | Business Finland, Helsinki, Finland                                                                             | outi.tuovila@businessfinland.fi      | Steering Committee   | Other Experts/ Non-Voting Members |
| Raimo Pakkanen       | Business Finland, Helsinki, Finland                                                                             | raimo.pakkanen@businessfinland.fi    | Steering Committee   | Other Experts/ Non-Voting Members |
| Jeffrey Waring       | Abbvie, Chicago, IL, United States                                                                              | jeff.waring@abbvie.com               | Scientific Committee | Pharmaceutical companies          |
| Bridget Riley-Gillis | Abbvie, Chicago, IL, United States                                                                              | bridget.rileygillis@abbvie.com       | Scientific Committee | Pharmaceutical companies          |
| Fedik Rahimov        | Abbvie, Chicago, IL, United States                                                                              | fedik.rahimov@abbvie.com             | Scientific Committee | Pharmaceutical companies          |
| Ioanna Tachmazidou   | Astra Zeneca, Cambridge, United Kingdom                                                                         | ioanna.tachmazidou@astrazeneca.com   | Scientific Committee | Pharmaceutical companies          |
| Chia-Yen Chen        | Biogen, Cambridge, MA, United States                                                                            | chiayen.chen@biogen.com              | Scientific Committee | Pharmaceutical companies          |
| Heiko Runz           | Biogen, Cambridge, MA, United States                                                                            | heiko.runz@biogen.com                | Scientific Committee | Pharmaceutical companies          |
| Zhihao Ding          | Boehringer Ingelheim, Ingelheim am Rhein, Germany                                                               | zhihao.ding@boehringer-ingelheim.com | Scientific Committee | Pharmaceutical companies          |



|                         |                                                                                                                 |                                           |                      |                                   |
|-------------------------|-----------------------------------------------------------------------------------------------------------------|-------------------------------------------|----------------------|-----------------------------------|
| Marc Jung               | Boehringer Ingelheim, Ingelheim am Rhein, Germany                                                               | marc_oliver.jung@boehringer-ingelheim.com | Scientific Committee | Pharmaceutical companies          |
| Shameek Biswas          | Bristol Myers Squibb, New York, NY, United States                                                               | Shameek.Biswas@bms.com                    | Scientific Committee | Pharmaceutical companies          |
| Rion Pendergrass        | Genentech, San Francisco, CA, United States                                                                     | penders2@gene.com                         | Scientific Committee | Pharmaceutical companies          |
| Julie Hunkapiller       | Genentech, San Francisco, CA, United States                                                                     | hunkapiller.julie@gene.com                | Scientific Committee | Pharmaceutical companies          |
| Margaret G. Ehm         | GlaxoSmithKline, Collegeville, PA, United States                                                                | meg.g.ehm@gsk.com                         | Scientific Committee | Pharmaceutical companies          |
| David Pulford           | GlaxoSmithKline, Stevenage, United Kingdom                                                                      | david.x.pulford@gsk.com                   | Scientific Committee | Pharmaceutical companies          |
| Neha Raghavan           | Merck, Kenilworth, NJ, United States                                                                            | neha.raghavan@merck.com                   | Scientific Committee | Pharmaceutical companies          |
| Adriana Huertas-Vazquez | Merck, Kenilworth, NJ, United States                                                                            | adriana.huertas.vazquez@merck.com         | Scientific Committee | Pharmaceutical companies          |
| Jae-Hoon Sul            | Merck, Kenilworth, NJ, United States                                                                            | jae.hoon.sul@merck.com                    | Scientific Committee | Pharmaceutical companies          |
| Anders Mälärstig        | Pfizer, New York, NY, United States                                                                             | anders.malarstig@pfizer.com               | Scientific Committee | Pharmaceutical companies          |
| Xinli Hu                | Pfizer, New York, NY, United States                                                                             | xinli.hu@pfizer.com                       | Scientific Committee | Pharmaceutical companies          |
| Katherine Klinger       | Translational Sciences, Sanofi R&D, Framingham, MA, USA                                                         | katherine.klinger@sanofi.com              | Scientific Committee | Pharmaceutical companies          |
| Robert Graham           | Maze Therapeutics, San Francisco, CA, United States                                                             | rgraham@mazetx.com                        | Scientific Committee | Pharmaceutical companies          |
| Eric Green              | Maze Therapeutics, San Francisco, CA, United States                                                             | egreen@mazetx.com                         | Scientific Committee | Pharmaceutical companies          |
| Sahar Mozaffari         | Maze Therapeutics, San Francisco, CA, United States                                                             | smozaffari@mazetx.com                     | Scientific Committee | Pharmaceutical companies          |
| Dawn Waterworth         | Janssen Research & Development, LLC, Spring House, PA, United States                                            | dwaterwo@its.jnj.com                      | Scientific Committee | Pharmaceutical companies          |
| Nicole Renaud           | Novartis Institutes for BioMedical Research, Cambridge, MA, United States                                       | nicole.renaud@novartis.com                | Scientific Committee | Pharmaceutical companies          |
| Ma'en Obeidat           | Novartis Institutes for BioMedical Research, Cambridge, MA, United States                                       | maen.obeidat@novartis.com                 | Scientific Committee | Pharmaceutical companies          |
| Samuli Ripatti          | Institute for Molecular Medicine Finland (FIMM), HiLIFE, University of Helsinki, Helsinki, Finland              | samuli.ripatti@helsinki.fi                | Scientific Committee | University of Helsinki & Biobanks |
| Johanna Schleutker      | Auria Biobank / Univ. of Turku / Hospital District of Southwest Finland, Turku, Finland                         | johanna.schleutker@utu.fi                 | Scientific Committee | University of Helsinki & Biobanks |
| Markus Perola           | THL Biobank / Finnish Institute for Health and Welfare (THL), Helsinki, Finland                                 | markus.perola@thl.fi                      | Scientific Committee | University of Helsinki & Biobanks |
| Mikko Arvas             | Finnish Red Cross Blood Service / Finnish Hematology Registry and Clinical Biobank, Helsinki, Finland           | mikko.arvas@veripalvelu.fi                | Scientific Committee | University of Helsinki & Biobanks |
| Olli Carpén             | Helsinki Biobank / Helsinki University and Hospital District of Helsinki and Uusimaa, Helsinki                  | olli.carpén@helsinki.fi                   | Scientific Committee | University of Helsinki & Biobanks |
| Reetta Hinttala         | Northern Finland Biobank Borealis / University of Oulu / Northern Ostrobothnia Hospital District, Oulu, Finland | reetta.hinttala@oulu.fi                   | Scientific Committee | University of Helsinki & Biobanks |
| Johannes Kettunen       | Northern Finland Biobank Borealis / University of Oulu / Northern Ostrobothnia Hospital District, Oulu, Finland | johannes.kettunen@oulu.fi                 | Scientific Committee | University of Helsinki & Biobanks |
| Arto Mannermaa          | Biobank of Eastern Finland / University of Eastern Finland / Northern Savo Hospital District, Kuopio, Finland   | arto.mannermaa@uef.fi                     | Scientific Committee | University of Helsinki & Biobanks |

|                       |                                                                                                              |                               |                      |                                   |
|-----------------------|--------------------------------------------------------------------------------------------------------------|-------------------------------|----------------------|-----------------------------------|
| Katriina Aalto-Setälä | Faculty of Medicine and Health Technology, Tampere University, Tampere, Finland                              | katriina.aalto-setala@tuni.fi | Scientific Committee | University of Helsinki & Biobanks |
| Mika Kähönen          | Finnish Clinical Biobank Tampere / University of Tampere / Pirkanmaa Hospital District, Tampere, Finland     | mika.kahonen@uta.fi           | Scientific Committee | University of Helsinki & Biobanks |
| Jari Laukkanen        | Central Finland Biobank / University of Jyväskylä / Central Finland Health Care District, Jyväskylä, Finland | jari.laukkanen@ksshp.fi       | Scientific Committee | University of Helsinki & Biobanks |
| Johanna Mäkelä        | FINBB - Finnish biobank cooperative                                                                          | johanna.makela@finbb.fi       | Scientific Committee | University of Helsinki & Biobanks |
| Reetta Kälviäinen     | Northern Savo Hospital District, Kuopio, Finland                                                             | reetta.kalviainen@kuh.fi      | Clinical Groups      | Neurology Group                   |
| Valtteri Julkunen     | Northern Savo Hospital District, Kuopio, Finland                                                             | valtteri.julkunen@kuh.fi      | Clinical Groups      | Neurology Group                   |
| Hilkka Soinen         | Northern Savo Hospital District, Kuopio, Finland                                                             | hilkka.soininen@uef.fi        | Clinical Groups      | Neurology Group                   |
| Anne Remes            | Northern Ostrobothnia Hospital District, Oulu, Finland                                                       | anne.remes@oulu.fi            | Clinical Groups      | Neurology Group                   |
| Mikko Hiltunen        | University of Eastern Finland, Kuopio, Finland                                                               | mikko.hiltunen@uef.fi         | Clinical Groups      | Neurology Group                   |
| Jukka Peltola         | Pirkanmaa Hospital District, Tampere, Finland                                                                | jukka.peltola@pshp.fi         | Clinical Groups      | Neurology Group                   |
| Minna Raivio          | Hospital District of Helsinki and Uusimaa, Helsinki, Finland                                                 | minna.raivio@geri.fi          | Clinical Groups      | Neurology Group                   |
| Pentti Tienari        | Hospital District of Helsinki and Uusimaa, Helsinki, Finland                                                 | pentti.tienari@hus.fi         | Clinical Groups      | Neurology Group                   |
| Juha Rinne            | Hospital District of Southwest Finland, Turku, Finland                                                       | juha.rinne@tyks.fi            | Clinical Groups      | Neurology Group                   |
| Roosa Kallionpää      | Hospital District of Southwest Finland, Turku, Finland                                                       | roosa.kallionpaa@tyks.fi      | Clinical Groups      | Neurology Group                   |
| Juulia Partanen       | Institute for Molecular Medicine Finland, HiLIFE, University of Helsinki, Finland                            | juulia.partanen@helsinki.fi   | Clinical Groups      | Neurology Group                   |
| Ali Abbasi            | Abbvie, Chicago, IL, United States                                                                           | ali.abbasi@abbvie.com         | Clinical Groups      | Neurology Group                   |
| Adam Ziemann          | Abbvie, Chicago, IL, United States                                                                           | adam.ziemann@abbvie.com       | Clinical Groups      | Neurology Group                   |
| Nizar Smaoui          | Abbvie, Chicago, IL, United States                                                                           | nizar.smaoui@abbvie.com       | Clinical Groups      | Neurology Group                   |
| Anne Lehtonen         | Abbvie, Chicago, IL, United States                                                                           | anne.lehtonen@abbvie.com      | Clinical Groups      | Neurology Group                   |
| Susan Eaton           | Biogen, Cambridge, MA, United States                                                                         | susan.eaton@biogen.com        | Clinical Groups      | Neurology Group                   |
| Heiko Runz            | Biogen, Cambridge, MA, United States                                                                         | heiko.runz@biogen.com         | Clinical Groups      | Neurology Group                   |
| Sanni Lahdenperä      | Biogen, Cambridge, MA, United States                                                                         | sanni.lahdenpera@biogen.com   | Clinical Groups      | Neurology Group                   |
| Shameek Biswas        | Bristol Myers Squibb, New York, NY, United States                                                            | shameek.biswas@bms.com        | Clinical Groups      | Neurology Group                   |
| Julie Hunkapiller     | Genentech, San Francisco, CA, United States                                                                  | hunkapiller.julie@gene.com    | Clinical Groups      | Neurology Group                   |
| Natalie Bowers        | Genentech, San Francisco, CA, United States                                                                  | bowersn1@gene.com             | Clinical Groups      | Neurology Group                   |
| Edmond Teng           | Genentech, San Francisco, CA, United States                                                                  | teng.edmond@gene.com          | Clinical Groups      | Neurology Group                   |
| Rion Pendergrass      | Genentech, San Francisco, CA, United States                                                                  | penders2@gene.com             | Clinical Groups      | Neurology Group                   |
| Fanli Xu              | GlaxoSmithKline, Brentford, United Kingdom                                                                   | chun-fang.2.xu@gsk.com        | Clinical Groups      | Neurology Group                   |
| David Pulford         | GlaxoSmithKline, Stevenage, United Kingdom                                                                   | david.x.pulford@gsk.com       | Clinical Groups      | Neurology Group                   |
| Kirsi Auro            | GlaxoSmithKline, Espoo, Finland                                                                              | kirsi.m.auro@gsk.com          | Clinical Groups      | Neurology Group                   |
| Laura Addis           | GlaxoSmithKline, Brentford, United Kingdom                                                                   | laura.x.addis@gsk.com         | Clinical Groups      | Neurology Group                   |
| John Eicher           | GlaxoSmithKline, Brentford, United Kingdom                                                                   | john.d.eicher@gsk.com         | Clinical Groups      | Neurology Group                   |
| Qingqin S Li          | Janssen Research & Development, LLC, Titusville, NJ 08560, United States                                     | QLi2@its.jnj.com              | Clinical Groups      | Neurology Group                   |
| Karen He              | Janssen Research & Development, LLC, Spring House, PA, United States                                         | khe2@its.jnj.com              | Clinical Groups      | Neurology Group                   |
| Ekaterina Khramtsova  | Janssen Research & Development, LLC, Spring House, PA, United States                                         | ekhramts@its.jnj.com          | Clinical Groups      | Neurology Group                   |
| Neha Raghavan         | Merck, Kenilworth, NJ, United States                                                                         | neha.raghavan@merck.com       | Clinical Groups      | Neurology Group                   |

|                    |                                                                                                                                                                         |                             |                 |                        |
|--------------------|-------------------------------------------------------------------------------------------------------------------------------------------------------------------------|-----------------------------|-----------------|------------------------|
| Martti Färkkilä    | Hospital District of Helsinki and Uusimaa, Helsinki, Finland                                                                                                            | martti.farkkila@hus.fi      | Clinical Groups | Gastroenterology Group |
| Jukka Koskela      | Hospital District of Helsinki and Uusimaa, Helsinki, Finland                                                                                                            | jukka.koskela@helsinki.fi   | Clinical Groups | Gastroenterology Group |
| Sampsa Pikkarainen | Hospital District of Helsinki and Uusimaa, Helsinki, Finland                                                                                                            | samps.pikkarainen@hus.fi    | Clinical Groups | Gastroenterology Group |
| Airi Jussila       | Pirkanmaa Hospital District, Tampere, Finland                                                                                                                           | airi.jussila@pshp.fi        | Clinical Groups | Gastroenterology Group |
| Katri Kaukinen     | Pirkanmaa Hospital District, Tampere, Finland                                                                                                                           | katri.kaukinen@tuni.fi      | Clinical Groups | Gastroenterology Group |
| Timo Blomster      | Northern Ostrobothnia Hospital District, Oulu, Finland                                                                                                                  | timo.blomster@ppshp.fi      | Clinical Groups | Gastroenterology Group |
| Mikko Kiviniemi    | Northern Savo Hospital District, Kuopio, Finland                                                                                                                        | mikko.kiviniemi@kuh.fi      | Clinical Groups | Gastroenterology Group |
| Markku Voutilainen | Hospital District of Southwest Finland, Turku, Finland                                                                                                                  | markku.voutilainen@tyks.fi  | Clinical Groups | Gastroenterology Group |
| Mark Daly          | Institute for Molecular Medicine, Finland (FIMM), HiLIFE, University of Helsinki, Helsinki, Finland; Broad Institute of MIT and Harvard; Massachusetts General Hospital | mark.daly@helsinki.fi       | Clinical Groups | Gastroenterology Group |
| Ali Abbasi         | Abbvie, Chicago, IL, United States                                                                                                                                      | ali.abbasi@abbvie.com       | Clinical Groups | Gastroenterology Group |
| Jeffrey Waring     | Abbvie, Chicago, IL, United States                                                                                                                                      | jeff.waring@abbvie.com      | Clinical Groups | Gastroenterology Group |
| Nizar Smaoui       | Abbvie, Chicago, IL, United States                                                                                                                                      | nizar.smaoui@abbvie.com     | Clinical Groups | Gastroenterology Group |
| Fedik Rahimov      | Abbvie, Chicago, IL, United States                                                                                                                                      | fedik.rahimov@abbvie.com    | Clinical Groups | Gastroenterology Group |
| Anne Lehtonen      | Abbvie, Chicago, IL, United States                                                                                                                                      | anne.lehtonen@abbvie.com    | Clinical Groups | Gastroenterology Group |
| Tim Lu             | Genentech, San Francisco, CA, United States                                                                                                                             | lut8@gene.com               | Clinical Groups | Gastroenterology Group |
| Natalie Bowers     | Genentech, San Francisco, CA, United States                                                                                                                             | bowersn1@gene.com           | Clinical Groups | Gastroenterology Group |
| Rion Pendergrass   | Genentech, San Francisco, CA, United States                                                                                                                             | penders2@gene.com           | Clinical Groups | Gastroenterology Group |
| Linda McCarthy     | GlaxoSmithKline, Brentford, United Kingdom                                                                                                                              | linda.c.mccarthy@gsk.com    | Clinical Groups | Gastroenterology Group |
| Amy Hart           | Janssen Research & Development, LLC, Spring House, PA, United States                                                                                                    | ahart13@its.jnj.com         | Clinical Groups | Gastroenterology Group |
| Meijian Guan       | Janssen Research & Development, LLC, Spring House, PA, United States                                                                                                    | mguan4@its.jnj.com          | Clinical Groups | Gastroenterology Group |
| Jason Miller       | Merck, Kenilworth, NJ, United States                                                                                                                                    | jason.miller4@merck.com     | Clinical Groups | Gastroenterology Group |
| Kirsi Kalpala      | Pfizer, New York, NY, United States                                                                                                                                     | kirsi.kalpala@pfizer.com    | Clinical Groups | Gastroenterology Group |
| Melissa Miller     | Pfizer, New York, NY, United States                                                                                                                                     | melissa.r.miller@pfizer.com | Clinical Groups | Gastroenterology Group |
| Xinli Hu           | Pfizer, New York, NY, United States                                                                                                                                     | xinli.hu@pfizer.com         | Clinical Groups | Gastroenterology Group |
| Kari Eklund        | Hospital District of Helsinki and Uusimaa, Helsinki, Finland                                                                                                            | kari eklund@hus.fi          | Clinical Groups | Rheumatology Group     |
| Antti Palomäki     | Hospital District of Southwest Finland, Turku, Finland                                                                                                                  | ajpalo@utu.fi               | Clinical Groups | Rheumatology Group     |
| Pia Isomäki        | Pirkanmaa Hospital District, Tampere, Finland                                                                                                                           | pia.isomaki@pshp.fi         | Clinical Groups | Rheumatology Group     |

|                          |                                                                                                                                    |                                             |                 |                    |
|--------------------------|------------------------------------------------------------------------------------------------------------------------------------|---------------------------------------------|-----------------|--------------------|
| Laura Pirilä             | Hospital District of Southwest Finland, Turku, Finland                                                                             | laura.pirila@fimnet.fi,laura.pirila@tyks.fi | Clinical Groups | Rheumatology Group |
| Oili Kaipiainen-Seppänen | Northern Savo Hospital District, Kuopio, Finland                                                                                   | oili.kaipiainen-seppanen@kuh.fi             | Clinical Groups | Rheumatology Group |
| Johanna Huhtakangas      | Northern Ostrobothnia Hospital District, Oulu, Finland                                                                             | johanna.huhtakangas@kuh.fi                  | Clinical Groups | Rheumatology Group |
| Nina Mars                | Institute for Molecular Medicine Finland (FIMM), HiLIFE, University of Helsinki, Helsinki, Finland                                 | nina.mars@helsinki.fi                       | Clinical Groups | Rheumatology Group |
| Ali Abbasi               | Abbvie, Chicago, IL, United States                                                                                                 | ali.abbasi@abbvie.com                       | Clinical Groups | Rheumatology Group |
| Jeffrey Waring           | Abbvie, Chicago, IL, United States                                                                                                 | jeff.waring@abbvie.com                      | Clinical Groups | Rheumatology Group |
| Fedik Rahimov            | Abbvie, Chicago, IL, United States                                                                                                 | fedik.rahimov@abbvie.com                    | Clinical Groups | Rheumatology Group |
| Apinya Lertratanakul     | Abbvie, Chicago, IL, United States                                                                                                 | apinya.lertratanakul@abbvie.com             | Clinical Groups | Rheumatology Group |
| Nizar Smaoui             | Abbvie, Chicago, IL, United States                                                                                                 | nizar.smaoui@abbvie.com                     | Clinical Groups | Rheumatology Group |
| Anne Lehtonen            | Abbvie, Chicago, IL, United States                                                                                                 | anne.lehtonen@abbvie.com                    | Clinical Groups | Rheumatology Group |
| Marla Hochfeld           | Bristol Myers Squibb, New York, NY, United States                                                                                  | mhochfeld@celgene.com                       | Clinical Groups | Rheumatology Group |
| Natalie Bowers           | Genentech, San Francisco, CA, United States                                                                                        | bowersn1@gene.com                           | Clinical Groups | Rheumatology Group |
| Rion Pendergrass         | Genentech, San Francisco, CA, United States                                                                                        | penders2@gene.com                           | Clinical Groups | Rheumatology Group |
| Jorge Esparza Gordillo   | GlaxoSmithKline, Brentford, United Kingdom                                                                                         | jorge.x.esparza-gordillo@gsk.com            | Clinical Groups | Rheumatology Group |
| Kirsi Auro               | GlaxoSmithKline, Espoo, Finland                                                                                                    | kirsi.m.auro@gsk.com                        | Clinical Groups | Rheumatology Group |
| Dawn Waterworth          | Janssen Research & Development, LLC, Spring House, PA, United States                                                               | dwaterwo@its.jnj.com                        | Clinical Groups | Rheumatology Group |
| Fabiana Farias           | Merck, Kenilworth, NJ, United States                                                                                               | fabiana.farias@merck.com                    | Clinical Groups | Rheumatology Group |
| Kirsi Kalpala            | Pfizer, New York, NY, United States                                                                                                | kirsi.kalpala@pfizer.com                    | Clinical Groups | Rheumatology Group |
| Nan Bing                 | Pfizer, New York, NY, United States                                                                                                | nan.bing@pfizer.com                         | Clinical Groups | Rheumatology Group |
| Xinli Hu                 | Pfizer, New York, NY, United States                                                                                                | xinli.hu@pfizer.com                         | Clinical Groups | Rheumatology Group |
| Tarja Laitinen           | Pirkanmaa Hospital District, Tampere, Finland                                                                                      | tarja.laitinen@pshp.fi                      | Clinical Groups | Pulmonology Group  |
| Margit Pelkonen          | Northern Savo Hospital District, Kuopio, Finland                                                                                   | margit.pelkonen@kuh.fi                      | Clinical Groups | Pulmonology Group  |
| Paula Kauppi             | Hospital District of Helsinki and Uusimaa, Helsinki, Finland                                                                       | paula.kauppi@hus.fi                         | Clinical Groups | Pulmonology Group  |
| Hannu Kankaanranta       | University of Gothenburg, Gothenburg, Sweden/ Seinäjoki Central Hospital, Seinäjoki, Finland/ Tampere University, Tampere, Finland | hannu.kankaanranta@tuni.fi                  | Clinical Groups | Pulmonology Group  |
| Terttu Harju             | Northern Ostrobothnia Hospital District, Oulu, Finland                                                                             | terttu.harju@oulu.fi                        | Clinical Groups | Pulmonology Group  |
| Riitta Lahesmaa          | Hospital District of Southwest Finland, Turku, Finland                                                                             | rilahes@utu.fi                              | Clinical Groups | Pulmonology Group  |
| Nizar Smaoui             | Abbvie, Chicago, IL, United States                                                                                                 | nizar.smaoui@abbvie.com                     | Clinical Groups | Pulmonology Group  |
| Glenda Lassi             | Astra Zeneca, Cambridge, United Kingdom                                                                                            | glenda.lassi@astrazeneca.com                | Clinical Groups | Pulmonology Group  |
| Susan Eaton              | Biogen, Cambridge, MA, United States                                                                                               | susan.eaton@biogen.com                      | Clinical Groups | Pulmonology Group  |
| Hubert Chen              | Genentech, San Francisco, CA, United States                                                                                        | chenh37@gene.com                            | Clinical Groups | Pulmonology Group  |
| Rion Pendergrass         | Genentech, San Francisco, CA, United States                                                                                        | penders2@gene.com                           | Clinical Groups | Pulmonology Group  |
| Natalie Bowers           | Genentech, San Francisco, CA, United States                                                                                        | bowersn1@gene.com                           | Clinical Groups | Pulmonology Group  |
| Joanna Betts             | GlaxoSmithKline, Brentford, United Kingdom                                                                                         | joanna.c.betts@gsk.com                      | Clinical Groups | Pulmonology Group  |
| Kirsi Auro               | GlaxoSmithKline, Espoo, Finland                                                                                                    | kirsi.m.auro@gsk.com                        | Clinical Groups | Pulmonology Group  |
| Rajashree Mishra         | GlaxoSmithKline, Brentford, United Kingdom                                                                                         | rajashree.x.mishra@gsk.com                  | Clinical Groups | Pulmonology Group  |
| Majd Mouded              | Novartis, Basel, Switzerland                                                                                                       | majd.mouded@novartis.com                    | Clinical Groups | Pulmonology Group  |
| Debby Ngo                | Novartis, Basel, Switzerland                                                                                                       | debby.ngo@novartis.com                      | Clinical Groups | Pulmonology Group  |

|                       |                                                                                                                                                                                             |                                   |                 |                                |
|-----------------------|---------------------------------------------------------------------------------------------------------------------------------------------------------------------------------------------|-----------------------------------|-----------------|--------------------------------|
| Teemu Niiranen        | Finnish Institute for Health and Welfare (THL), Helsinki, Finland                                                                                                                           | teemu.niiranen@thl.fi             | Clinical Groups | Cardiometabolic Diseases Group |
| Felix Vaura           | Finnish Institute for Health and Welfare (THL), Helsinki, Finland                                                                                                                           | fechva@utu.fi                     | Clinical Groups | Cardiometabolic Diseases Group |
| Veikko Salomaa        | Finnish Institute for Health and Welfare (THL), Helsinki, Finland                                                                                                                           | veikko.salomaa@thl.fi             | Clinical Groups | Cardiometabolic Diseases Group |
| Kaj Metsärinne        | Hospital District of Southwest Finland, Turku, Finland                                                                                                                                      | kaj.metsarinne@tyks.fi            | Clinical Groups | Cardiometabolic Diseases Group |
| Jenni Aittokallio     | Hospital District of Southwest Finland, Turku, Finland                                                                                                                                      | jemato@utu.fi                     | Clinical Groups | Cardiometabolic Diseases Group |
| Mika Kähönen          | Pirkanmaa Hospital District, Tampere, Finland                                                                                                                                               | mika.kahonen@uta.fi               | Clinical Groups | Cardiometabolic Diseases Group |
| Jussi Hernesniemi     | Pirkanmaa Hospital District, Tampere, Finland                                                                                                                                               | jussi.hernesniemi@tuni.fi         | Clinical Groups | Cardiometabolic Diseases Group |
| Daniel Gordin         | Hospital District of Helsinki and Uusimaa, Helsinki, Finland                                                                                                                                | daniel.gordin@hus.fi              | Clinical Groups | Cardiometabolic Diseases Group |
| Juha Sinisalo         | Hospital District of Helsinki and Uusimaa, Helsinki, Finland                                                                                                                                | juha.sinisalo@hus.fi              | Clinical Groups | Cardiometabolic Diseases Group |
| Marja-Riitta Taskinen | Hospital District of Helsinki and Uusimaa, Helsinki, Finland                                                                                                                                | marja-riitta.taskinen@helsinki.fi | Clinical Groups | Cardiometabolic Diseases Group |
| Tiinamaija Tuomi      | Hospital District of Helsinki and Uusimaa, Helsinki, Finland                                                                                                                                | tiinamaija.tuomi@hus.fi           | Clinical Groups | Cardiometabolic Diseases Group |
| Timo Hiltunen         | Hospital District of Helsinki and Uusimaa, Helsinki, Finland                                                                                                                                | timo.hiltunen@hus.fi              | Clinical Groups | Cardiometabolic Diseases Group |
| Jari Laukkanen        | Central Finland Health Care District, Jyväskylä, Finland                                                                                                                                    | jari.laukkanen@ksshp.fi           | Clinical Groups | Cardiometabolic Diseases Group |
| Amanda Elliott        | Institute for Molecular Medicine Finland (FIMM), HiLIFE, University of Helsinki, Helsinki, Finland; Broad Institute, Cambridge, MA, USA and Massachusetts General Hospital, Boston, MA, USA | aelliott@broadinstitute.org       | Clinical Groups | Cardiometabolic Diseases Group |
| Mary Pat Reeve        | Institute for Molecular Medicine Finland (FIMM), HiLIFE, University of Helsinki, Helsinki, Finland                                                                                          | mary.reeve@helsinki.fi            | Clinical Groups | Cardiometabolic Diseases Group |
| Sanni Ruotsalainen    | Institute for Molecular Medicine Finland (FIMM), HiLIFE, University of Helsinki, Helsinki, Finland                                                                                          | sanni.ruotsalainen@helsinki.fi    | Clinical Groups | Cardiometabolic Diseases Group |
| Benjamin Challis      | Astra Zeneca, Cambridge, United Kingdom                                                                                                                                                     | benjamin.challis@astrazeneca.com  | Clinical Groups | Cardiometabolic Diseases Group |
| Dirk Paul             | Astra Zeneca, Cambridge, United Kingdom                                                                                                                                                     | dirk.paul@astrazeneca.com         | Clinical Groups | Cardiometabolic Diseases Group |
| Julie Hunkapiller     | Genentech, San Francisco, CA, United States                                                                                                                                                 | hunkapiller.julie@gene.com        | Clinical Groups | Cardiometabolic Diseases Group |
| Natalie Bowers        | Genentech, San Francisco, CA, United States                                                                                                                                                 | bowersn1@gene.com                 | Clinical Groups | Cardiometabolic Diseases Group |
| Rion Pendergrass      | Genentech, San Francisco, CA, United States                                                                                                                                                 | penders2@gene.com                 | Clinical Groups | Cardiometabolic Diseases Group |
| Audrey Chu            | GlaxoSmithKline, Brentford, United Kingdom                                                                                                                                                  | audrey.y.chu@gsk.com              | Clinical Groups | Cardiometabolic Diseases Group |
| Kirsi Auro            | GlaxoSmithKline, Espoo, Finland                                                                                                                                                             | kirsi.m.auro@gsk.com              | Clinical Groups | Cardiometabolic Diseases Group |
| Dermot Reilly         | Janssen Research & Development, LLC, Boston, MA, United States                                                                                                                              | dreill11@its.jnj.com              | Clinical Groups | Cardiometabolic Diseases Group |
| Mike Mendelson        | Novartis, Boston, MA, United States                                                                                                                                                         | mike.mendelson@novartis.com       | Clinical Groups | Cardiometabolic Diseases Group |
| Jaakko Parkkinen      | Pfizer, New York, NY, United States                                                                                                                                                         | jaakko.parkkinen@pfizer.com       | Clinical Groups | Cardiometabolic Diseases Group |
| Melissa Miller        | Pfizer, New York, NY, United States                                                                                                                                                         | melissa.r.miller@pfizer.com       | Clinical Groups | Cardiometabolic Diseases Group |

|                      |                                                                                                                                                                        |                                |                 |                     |
|----------------------|------------------------------------------------------------------------------------------------------------------------------------------------------------------------|--------------------------------|-----------------|---------------------|
| Tuomo Meretoja       | Hospital District of Helsinki and Uusimaa, Helsinki, Finland                                                                                                           | tuomo.meretoja@hus.fi          | Clinical Groups | Oncology Group      |
| Heikki Joensuu       | Hospital District of Helsinki and Uusimaa, Helsinki, Finland                                                                                                           | heikki.joensuu@hus.fi          | Clinical Groups | Oncology Group      |
| Olli Carpén          | Hospital District of Helsinki and Uusimaa, Helsinki, Finland                                                                                                           | olli.carpén@helsinki.fi        | Clinical Groups | Oncology Group      |
| Johanna Mattson      | Hospital District of Helsinki and Uusimaa, Helsinki, Finland                                                                                                           | johanna.mattson@hus.fi         | Clinical Groups | Oncology Group      |
| Eveliina Salminen    | Hospital District of Helsinki and Uusimaa, Helsinki, Finland                                                                                                           | eveliina.e.salminen@hus.fi     | Clinical Groups | Oncology Group      |
| Annika Auranen       | Pirkanmaa Hospital District , Tampere, Finland                                                                                                                         | anaura@utu.fi                  | Clinical Groups | Oncology Group      |
| Peeter Karihtala     | Northern Ostrobothnia Hospital District, Oulu, Finland                                                                                                                 | peeter.karihtala@oulu.fi       | Clinical Groups | Oncology Group      |
| Päivi Auvinen        | Northern Savo Hospital District, Kuopio, Finland                                                                                                                       | paivi.auvinen@kuh.fi           | Clinical Groups | Oncology Group      |
| Klaus Elenius        | Hospital District of Southwest Finland, Turku, Finland                                                                                                                 | klaus.elenius@utu.fi           | Clinical Groups | Oncology Group      |
| Johanna Schleutker   | Hospital District of Southwest Finland, Turku, Finland                                                                                                                 | johanna.schleutker@utu.fi      | Clinical Groups | Oncology Group      |
| Esa Pitkänen         | Institute for Molecular Medicine Finland (FIMM), HiLIFE, University of Helsinki, Helsinki, Finland                                                                     | esa.pitkanen@helsinki.fi       | Clinical Groups | Oncology Group      |
| Nina Mars            | Institute for Molecular Medicine Finland (FIMM), HiLIFE, University of Helsinki, Helsinki, Finland                                                                     | nina.mars@helsinki.fi          | Clinical Groups | Oncology Group      |
| Mark Daly            | Institute for Molecular Medicine Finland (FIMM), HiLIFE, University of Helsinki, Helsinki, Finland; Broad Institute of MIT and Harvard; Massachusetts General Hospital | mark.daly@helsinki.fi          | Clinical Groups | Oncology Group      |
| Relja Popovic        | Abbvie, Chicago, IL, United States                                                                                                                                     | relja.popovic@abbvie.com       | Clinical Groups | Oncology Group      |
| Jeffrey Waring       | Abbvie, Chicago, IL, United States                                                                                                                                     | jeff.waring@abbvie.com         | Clinical Groups | Oncology Group      |
| Bridget Riley-Gillis | Abbvie, Chicago, IL, United States                                                                                                                                     | bridget.rileygillis@abbvie.com | Clinical Groups | Oncology Group      |
| Anne Lehtonen        | Abbvie, Chicago, IL, United States                                                                                                                                     | anne.lehtonen@abbvie.com       | Clinical Groups | Oncology Group      |
| Jennifer Schutzman   | Genentech, San Francisco, CA, United States                                                                                                                            | schutzman.jennifer@gene.com    | Clinical Groups | Oncology Group      |
| Julie Hunkapiller    | Genentech, San Francisco, CA, United States                                                                                                                            | hunkapiller.julie@gene.com     | Clinical Groups | Oncology Group      |
| Natalie Bowers       | Genentech, San Francisco, CA, United States                                                                                                                            | bowersn1@gene.com              | Clinical Groups | Oncology Group      |
| Rion Pendergrass     | Genentech, San Francisco, CA, United States                                                                                                                            | penders2@gene.com              | Clinical Groups | Oncology Group      |
| Diptee Kulkarni      | GlaxoSmithKline, Brentford, United Kingdom                                                                                                                             | diptee.a.kulkarni@gsk.com      | Clinical Groups | Oncology Group      |
| Kirsi Auro           | GlaxoSmithKline, Espoo, Finland                                                                                                                                        | kirsi.m.auro@gsk.com           | Clinical Groups | Oncology Group      |
| Alessandro Porello   | Janssen Research & Development, LLC, Spring House, PA, United States                                                                                                   | APorell@ITS.JNJ.com            | Clinical Groups | Oncology Group      |
| Andrey Loboda        | Merck, Kenilworth, NJ, United States                                                                                                                                   | andrey_loboda@merck.com        | Clinical Groups | Oncology Group      |
| Heli Lehtonen        | Pfizer, New York, NY, United States                                                                                                                                    | heli.lehtonen@pfizer.com       | Clinical Groups | Oncology Group      |
| Stefan McDonough     | Pfizer, New York, NY, United States                                                                                                                                    | stefan.McDonough@pfizer.com    | Clinical Groups | Oncology Group      |
| Sauli Vuoti          | Janssen-Cilag Oy, Espoo, Finland                                                                                                                                       | svuoti@its.jnj.com             | Clinical Groups | Oncology Group      |
| Kai Kaarniranta      | Northern Savo Hospital District, Kuopio, Finland                                                                                                                       | kai.kaarniranta@uef.fi         | Clinical Groups | Ophthalmology Group |
| Joni A Turunen       | Helsinki University Hospital and University of Helsinki, Helsinki, Finland; Eye Genetics Group, Folkhälsan Research Center, Helsinki, Finland                          | joni.turunen@helsinki.fi       | Clinical Groups | Ophthalmology Group |
| Terhi Ollila         | Hospital District of Helsinki and Uusimaa, Helsinki, Finland                                                                                                           | terhi.ollila@hus.fi            | Clinical Groups | Ophthalmology Group |
| Hannu Uusitalo       | Pirkanmaa Hospital District, Tampere, Finland                                                                                                                          | hannu.uusitalo@tuni.fi         | Clinical Groups | Ophthalmology Group |
| Juha Karjalainen     | Institute for Molecular Medicine Finland (FIMM), HiLIFE, University of Helsinki, Helsinki, Finland                                                                     | juha.karjalainen@helsinki.fi   | Clinical Groups | Ophthalmology Group |

|                          |                                                                                                                                                                                             |                                 |                 |                     |
|--------------------------|---------------------------------------------------------------------------------------------------------------------------------------------------------------------------------------------|---------------------------------|-----------------|---------------------|
| Esa Pitkänen             | Institute for Molecular Medicine Finland (FIMM), HiLIFE, University of Helsinki, Helsinki, Finland                                                                                          | esa.pitkanen@helsinki.fi        | Clinical Groups | Ophthalmology Group |
| Mengzhen Liu             | Abbvie, Chicago, IL, United States                                                                                                                                                          | mengzhen.liu@abbvie.com         | Clinical Groups | Ophthalmology Group |
| Heiko Runz               | Biogen, Cambridge, MA, United States                                                                                                                                                        | heiko.runz@biogen.com           | Clinical Groups | Ophthalmology Group |
| Stephanie Loomis         | Biogen, Cambridge, MA, United States                                                                                                                                                        | stephanie.loomis@biogen.com     | Clinical Groups | Ophthalmology Group |
| Erich Strauss            | Genentech, San Francisco, CA, United States                                                                                                                                                 | strauss.erich@gene.com          | Clinical Groups | Ophthalmology Group |
| Natalie Bowers           | Genentech, San Francisco, CA, United States                                                                                                                                                 | bowersn1@gene.com               | Clinical Groups | Ophthalmology Group |
| Hao Chen                 | Genentech, San Francisco, CA, United States                                                                                                                                                 | haoc@gene.com                   | Clinical Groups | Ophthalmology Group |
| Rion Pendergrass         | Genentech, San Francisco, CA, United States                                                                                                                                                 | penders2@gene.com               | Clinical Groups | Ophthalmology Group |
| Kaisa Tasanen            | Northern Ostrobothnia Hospital District, Oulu, Finland                                                                                                                                      | kaisa.tasanen-maatta@oulu.fi    | Clinical Groups | Dermatology Group   |
| Laura Huilaja            | Northern Ostrobothnia Hospital District, Oulu, Finland                                                                                                                                      | laura.huilaja@oulu.fi           | Clinical Groups | Dermatology Group   |
| Katariina Hannula-Jouppi | Hospital District of Helsinki and Uusimaa, Helsinki, Finland                                                                                                                                | katariina.hannula-jouppi@hus.fi | Clinical Groups | Dermatology Group   |
| Teea Salmi               | Pirkanmaa Hospital District, Tampere, Finland                                                                                                                                               | teea.salmi@pshp.fi              | Clinical Groups | Dermatology Group   |
| Sirkku Peltonen          | Hospital District of Southwest Finland, Turku, Finland                                                                                                                                      | sipelto@utu.fi                  | Clinical Groups | Dermatology Group   |
| Leena Koulu              | Hospital District of Southwest Finland, Turku, Finland                                                                                                                                      | leena.koulu@tyks.fi             | Clinical Groups | Dermatology Group   |
| Nizar Smaoui             | Abbvie, Chicago, IL, United States                                                                                                                                                          | nizar.smaoui@abbvie.com         | Clinical Groups | Dermatology Group   |
| Fedik Rahimov            | Abbvie, Chicago, IL, United States                                                                                                                                                          | fedik.rahimov@abbvie.com        | Clinical Groups | Dermatology Group   |
| Anne Lehtonen            | Abbvie, Chicago, IL, United States                                                                                                                                                          | anne.lehtonen@abbvie.com        | Clinical Groups | Dermatology Group   |
| David Choy               | Genentech, San Francisco, CA, United States                                                                                                                                                 | choy.david@gene.com             | Clinical Groups | Dermatology Group   |
| Rion Pendergrass         | Genentech, San Francisco, CA, United States                                                                                                                                                 | penders2@gene.com               | Clinical Groups | Dermatology Group   |
| Dawn Waterworth          | Janssen Research & Development, LLC, Spring House, PA, United States                                                                                                                        | dwaterwo@its.jnj.com            | Clinical Groups | Dermatology Group   |
| Kirsi Kalpala            | Pfizer, New York, NY, United States                                                                                                                                                         | kirsi.kalpala@pfizer.com        | Clinical Groups | Dermatology Group   |
| Ying Wu                  | Pfizer, New York, NY, United States                                                                                                                                                         | ying.wu3@pfizer.com             | Clinical Groups | Dermatology Group   |
| Pirkko Pussinen          | Hospital District of Helsinki and Uusimaa, Helsinki, Finland                                                                                                                                | pirkko.pussinen@helsinki.fi     | Clinical Groups | Odontology Group    |
| Aino Salminen            | Hospital District of Helsinki and Uusimaa, Helsinki, Finland                                                                                                                                | aino.m.salminen@helsinki.fi     | Clinical Groups | Odontology Group    |
| Tuula Salo               | Hospital District of Helsinki and Uusimaa, Helsinki, Finland                                                                                                                                | tuula.salo@helsinki.fi          | Clinical Groups | Odontology Group    |
| David Rice               | Hospital District of Helsinki and Uusimaa, Helsinki, Finland                                                                                                                                | david.rice@helsinki.fi          | Clinical Groups | Odontology Group    |
| Pekka Nieminen           | Hospital District of Helsinki and Uusimaa, Helsinki, Finland                                                                                                                                | pekka.nieminen@helsinki.fi      | Clinical Groups | Odontology Group    |
| Ulla Palotie             | Hospital District of Helsinki and Uusimaa, Helsinki, Finland                                                                                                                                | ulla.palotie@helsinki.fi        | Clinical Groups | Odontology Group    |
| Maria Siponen            | Northern Savo Hospital District, Kuopio, Finland                                                                                                                                            | maria.siponen@uef.fi            | Clinical Groups | Odontology Group    |
| Liisa Suominen           | Northern Savo Hospital District, Kuopio, Finland                                                                                                                                            | liisa.suominen@uef.fi           | Clinical Groups | Odontology Group    |
| Päivi Mäntylä            | Northern Savo Hospital District, Kuopio, Finland                                                                                                                                            | paivi.mantyla@uef.fi            | Clinical Groups | Odontology Group    |
| Ulvi Gursoy              | Hospital District of Southwest Finland, Turku, Finland                                                                                                                                      | ulvi.gursoy@utu.fi              | Clinical Groups | Odontology Group    |
| Vuokko Anttonen          | Northern Ostrobothnia Hospital District, Oulu, Finland                                                                                                                                      | vuokko.anttonen@oulu.fi         | Clinical Groups | Odontology Group    |
| Kirsi Sipilä             | Research Unit of Oral Health Sciences Faculty of Medicine, University of Oulu, Oulu, Finland; Medical Research Center, Oulu, Oulu University Hospital and University of Oulu, Oulu, Finland | kirsi.sipila@oulu.fi            | Clinical Groups | Odontology Group    |
| Rion Pendergrass         | Genentech, San Francisco, CA, United States                                                                                                                                                 | pendergross.sarah@gene.com      | Clinical Groups | Odontology Group    |

|                         |                                                                                                                                                                        |                                 |                 |                                       |
|-------------------------|------------------------------------------------------------------------------------------------------------------------------------------------------------------------|---------------------------------|-----------------|---------------------------------------|
| Hannele Laivuori        | Institute for Molecular Medicine Finland (FIMM), HiLIFE, University of Helsinki, Helsinki, Finland                                                                     | hannele.laivuori@helsinki.fi    | Clinical Groups | Women's Health and Reproduction Group |
| Venla Kurra             | Pirkanmaa Hospital District, Tampere, Finland                                                                                                                          | venla.kurra@tuni.fi             | Clinical Groups | Women's Health and Reproduction Group |
| Laura Kotaniemi-Talonen | Pirkanmaa Hospital District, Tampere, Finland                                                                                                                          | laura.kotaniemi-talonen@tuni.fi | Clinical Groups | Women's Health and Reproduction Group |
| Oskari Heikinheimo      | Hospital District of Helsinki and Uusimaa, Helsinki, Finland                                                                                                           | oskari.heikinheimo@helsinki.fi  | Clinical Groups | Women's Health and Reproduction Group |
| Ilkka Kalliala          | Hospital District of Helsinki and Uusimaa, Helsinki, Finland                                                                                                           | ilkka.kalliala@hus.fi           | Clinical Groups | Women's Health and Reproduction Group |
| Lauri Aaltonen          | Hospital District of Helsinki and Uusimaa, Helsinki, Finland                                                                                                           | lauri.aaltonen@helsinki.fi      | Clinical Groups | Women's Health and Reproduction Group |
| Varpu Jokimaa           | Hospital District of Southwest Finland, Turku, Finland                                                                                                                 | varpu.jokimaa@utu.fi            | Clinical Groups | Women's Health and Reproduction Group |
| Johannes Kettunen       | Northern Ostrobothnia Hospital District, Oulu, Finland                                                                                                                 | Johannes.Kettunen@oulu.fi       | Clinical Groups | Women's Health and Reproduction Group |
| Marja Väärasmäki        | Northern Ostrobothnia Hospital District, Oulu, Finland                                                                                                                 | marja.vaarasmaki@oulu.fi        | Clinical Groups | Women's Health and Reproduction Group |
| Outi Uimari             | Northern Ostrobothnia Hospital District, Oulu, Finland                                                                                                                 | outi.uimari@oulu.fi             | Clinical Groups | Women's Health and Reproduction Group |
| Laure Morin-Papunen     | Northern Ostrobothnia Hospital District, Oulu, Finland                                                                                                                 | lmp@cc.oulu.fi                  | Clinical Groups | Women's Health and Reproduction Group |
| Maarit Niinimäki        | Northern Ostrobothnia Hospital District, Oulu, Finland                                                                                                                 | maarit.niinimaki@oulu.fi        | Clinical Groups | Women's Health and Reproduction Group |
| Terhi Pilttonen         | Northern Ostrobothnia Hospital District, Oulu, Finland                                                                                                                 | terhi.pilttonen@oulu.fi         | Clinical Groups | Women's Health and Reproduction Group |
| Katja Kivinen           | Institute for Molecular Medicine Finland (FIMM), HiLIFE, University of Helsinki, Helsinki, Finland                                                                     | katja.kivinen@helsinki.fi       | Clinical Groups | Women's Health and Reproduction Group |
| Elisabeth Widen         | Institute for Molecular Medicine Finland (FIMM), HiLIFE, University of Helsinki, Helsinki, Finland                                                                     | elisabeth.widen@helsinki.fi     | Clinical Groups | Women's Health and Reproduction Group |
| Taru Tukiainen          | Institute for Molecular Medicine Finland (FIMM), HiLIFE, University of Helsinki, Helsinki, Finland                                                                     | taru.tukiainen@helsinki.fi      | Clinical Groups | Women's Health and Reproduction Group |
| Mary Pat Reeve          | Institute for Molecular Medicine Finland (FIMM), HiLIFE, University of Helsinki, Helsinki, Finland                                                                     | mary.reeve@helsinki.fi          | Clinical Groups | Women's Health and Reproduction Group |
| Mark Daly               | Institute for Molecular Medicine Finland (FIMM), HiLIFE, University of Helsinki, Helsinki, Finland; Broad Institute of MIT and Harvard; Massachusetts General Hospital | mark.daly@helsinki.fi           | Clinical Groups | Women's Health and Reproduction Group |
| Niko Välimäki           | University of Helsinki, Helsinki, Finland                                                                                                                              | niko.valimaki@helsinki.fi       | Clinical Groups | Women's Health and Reproduction Group |
| Eija Laakkonen          | University of Jyväskylä, Jyväskylä, Finland                                                                                                                            | eija.k.laakkonen@jyu.fi         | Clinical Groups | Women's Health and Reproduction Group |
| Jaakko Tyrmi            | University of Oulu, Oulu, Finland / University of Tampere, Tampere, Finland                                                                                            | jaakko.tyrmi@oulu.fi            | Clinical Groups | Women's Health and Reproduction Group |
| Heidi Silven            | University of Oulu, Oulu, Finland                                                                                                                                      | heidi.silven@student.oulu.fi    | Clinical Groups | Women's Health and Reproduction Group |
| Eeva Sliz               | University of Oulu, Oulu, Finland                                                                                                                                      | eeva.sliz@oulu.fi               | Clinical Groups | Women's Health and Reproduction Group |
| Riikka Arffman          | University of Oulu, Oulu, Finland                                                                                                                                      | riikka.arffman@oulu.fi          | Clinical Groups | Women's Health and Reproduction Group |
| Susanna Savukoski       | University of Oulu, Oulu, Finland                                                                                                                                      | susanna.savukoski@oulu.fi       | Clinical Groups | Women's Health and Reproduction Group |
| Triin Laisk             | Estonian biobank, Tartu, Estonia                                                                                                                                       | triin.laisk@ut.ee               | Clinical Groups | Women's Health and Reproduction Group |
| Natalia Pujol           | Estonian biobank, Tartu, Estonia                                                                                                                                       | natalia.pujolgualdo@oulu.fi     | Clinical Groups | Women's Health and Reproduction Group |



|                            |                                                                                                                                                                         |                                    |                                |                                       |
|----------------------------|-------------------------------------------------------------------------------------------------------------------------------------------------------------------------|------------------------------------|--------------------------------|---------------------------------------|
| Mengzhen Liu               | Abbvie, Chicago, IL, United States                                                                                                                                      | mengzhen.liu@abbvie.com            | Clinical Groups                | Women's Health and Reproduction Group |
| Bridget Riley-Gillis       | Abbvie, Chicago, IL, United States                                                                                                                                      | bridget.rileygillis@abbvie.com     | Clinical Groups                | Women's Health and Reproduction Group |
| Rion Pendergrass           | Genentech, San Francisco, CA, United States                                                                                                                             | penders2@gene.com                  | Clinical Groups                | Women's Health and Reproduction Group |
| Janet Kumar                | GlaxoSmithKline, Collegeville, PA, United States                                                                                                                        | janet.x.kumar@gsk.com              | Clinical Groups                | Women's Health and Reproduction Group |
| Kirsi Auro                 | GlaxoSmithKline, Espoo, Finland                                                                                                                                         | kirsi.m.auro@gsk.com               | Clinical Groups                | Women's Health and Reproduction Group |
| Iiris Hovatta              | University of Helsinki, Finland                                                                                                                                         | iiris.hovatta@helsinki.fi          | Clinical Groups                | Depression group                      |
| Chia-Yen Chen              | Biogen, Cambridge, MA, United States                                                                                                                                    | chiayen.chen@biogen.com            | Clinical Groups                | Depression group                      |
| Erkki Isometsä             | Hospital District of Helsinki and Uusimaa, Helsinki, Finland                                                                                                            | erkki.isometsa@hus.fi              | Clinical Groups                | Depression group                      |
| Hanna Ollila               | Institute for Molecular Medicine Finland (FIMM), HiLIFE, University of Helsinki, Helsinki, Finland                                                                      | hanna.m.ollila@helsinki.fi         | Clinical Groups                | Depression group                      |
| Jaana Suvisaari            | Finnish Institute for Health and Welfare (THL), Helsinki, Finland                                                                                                       | jaana.suvisaari@thl.fi             | Clinical Groups                | Depression group                      |
| Thomas Damm Als            | Aarhus University, Denmark                                                                                                                                              | tda@biomed.au.dk                   | Clinical Groups                | Depression group                      |
| Antti Mäkitie              | Department of Otorhinolaryngology - Head and Neck Surgery, University of Helsinki and Helsinki University Hospital, Helsinki, Finland                                   | antti.makitie@helsinki.fi          | Clinical Groups                | ENT (ear, nose and throat) Group      |
| Argyro Bizaki-Vallaskangas | Pirkanmaa Hospital District, Tampere, Finland                                                                                                                           | argyro.bizaki-vallaskangas@tuni.fi | Clinical Groups                | ENT (ear, nose and throat) Group      |
| Sanna Toppila-Salmi        | University of Helsinki, Finland                                                                                                                                         | sanna.salmi@helsinki.fi            | Clinical Groups                | ENT (ear, nose and throat) Group      |
| Tytti Willberg             | Hospital District of Southwest Finland, Turku, Finland                                                                                                                  | tytti.willberg@tyks.fi             | Clinical Groups                | ENT (ear, nose and throat) Group      |
| Elmo Saarentaus            | Institute for Molecular Medicine Finland (FIMM), HiLIFE, University of Helsinki, Helsinki, Finland                                                                      | elmo.saarentaus@helsinki.fi        | Clinical Groups                | ENT (ear, nose and throat) Group      |
| Antti Aarnisalo            | Hospital District of Helsinki and Uusimaa, Helsinki, Finland                                                                                                            | antti.aarnisalo@hus.fi             | Clinical Groups                | ENT (ear, nose and throat) Group      |
| Eveliina Salminen          | Hospital District of Helsinki and Uusimaa, Helsinki, Finland                                                                                                            | eveliina.e.salminen@hus.fi         | Clinical Groups                | ENT (ear, nose and throat) Group      |
| Elisa Rahikkala            | Northern Ostrobothnia Hospital District, Oulu, Finland                                                                                                                  | elisa.rahikkala@ppshp.fi           | Clinical Groups                | ENT (ear, nose and throat) Group      |
| Johannes Kettunen          | Northern Ostrobothnia Hospital District, Oulu, Finland                                                                                                                  | johannes.kettunen@oulu.fi          | Clinical Groups                | ENT (ear, nose and throat) Group      |
| Kristiina Aittomäki        | Department of Medical Genetics, Helsinki University Central Hospital, Helsinki, Finland                                                                                 | kristiina.aittomaki@helsinki.fi    | Clinical Groups                | POI (premature ovarian failure) Group |
| Fredrik Åberg              | Transplantation and Liver Surgery Clinic, Helsinki University Hospital, Helsinki University, Helsinki, Finland                                                          | fredrik.aberg@helsinki.fi          | Clinical Groups                | LiverScore Group                      |
| Mitja Kurki                | Institute for Molecular Medicine Finland (FIMM), HiLIFE, University of Helsinki, Helsinki, Finland; Broad Institute, Cambridge, MA, United States                       | mkurki@broadinstitute.org          | FinnGen Analysis working group | FinnGen Analysis working group        |
| Samuli Ripatti             | Institute for Molecular Medicine Finland (FIMM), HiLIFE, University of Helsinki, Helsinki, Finland                                                                      | samuli.ripatti@helsinki.fi         | FinnGen Analysis working group | FinnGen Analysis working group        |
| Mark Daly                  | Institute for Molecular Medicine, Finland (FIMM), HiLIFE, University of Helsinki, Helsinki, Finland; Broad Institute of MIT and Harvard; Massachusetts General Hospital | mark.daly@helsinki.fi              | FinnGen Analysis working group | FinnGen Analysis working group        |
| Juha Karjalainen           | Institute for Molecular Medicine Finland (FIMM), HiLIFE, University of Helsinki, Helsinki, Finland                                                                      | juha.karjalainen@helsinki.fi       | FinnGen Analysis working group | FinnGen Analysis working group        |
| Aki Havulinna              | Institute for Molecular Medicine Finland (FIMM), HiLIFE, University of Helsinki, Helsinki, Finland;                                                                     | aki.havulinna@helsinki.fi          | FinnGen Analysis working group | FinnGen Analysis working group        |

|                             |                                                                                                    |                                       |                                |                                |
|-----------------------------|----------------------------------------------------------------------------------------------------|---------------------------------------|--------------------------------|--------------------------------|
|                             | Finnish Institute for Health and Welfare (THL), Helsinki, Finland                                  |                                       |                                |                                |
| Juha Mehtonen               | Institute for Molecular Medicine Finland (FIMM), HiLIFE, University of Helsinki, Helsinki, Finland | juha.mehtonen@helsinki.fi             | FinnGen Analysis working group | FinnGen Analysis working group |
| Priit Palta                 | Institute for Molecular Medicine Finland (FIMM), HiLIFE, University of Helsinki, Helsinki, Finland | priit.palta@helsinki.fi               | FinnGen Analysis working group | FinnGen Analysis working group |
| Shabbeer Hassan             | Institute for Molecular Medicine Finland (FIMM), HiLIFE, University of Helsinki, Helsinki, Finland | shabbeer.hassan@helsinki.fi           | FinnGen Analysis working group | FinnGen Analysis working group |
| Pietro Della Briotta Parolo | Institute for Molecular Medicine Finland (FIMM), HiLIFE, University of Helsinki, Helsinki, Finland | pietro.dellabriottaparolo@helsinki.fi | FinnGen Analysis working group | FinnGen Analysis working group |
| Wei Zhou                    | Broad Institute, Cambridge, MA, United States                                                      | wzhou@broadinstitute.org              | FinnGen Analysis working group | FinnGen Analysis working group |
| Mutaamba Maasha             | Broad Institute, Cambridge, MA, United States                                                      | mmaasha@broadinstitute.org            | FinnGen Analysis working group | FinnGen Analysis working group |
| Shabbeer Hassan             | Institute for Molecular Medicine Finland (FIMM), HiLIFE, University of Helsinki, Helsinki, Finland | shabbeer.hassan@helsinki.fi           | FinnGen Analysis working group | FinnGen Analysis working group |
| Susanna Lemmelä             | Institute for Molecular Medicine Finland (FIMM), HiLIFE, University of Helsinki, Helsinki, Finland | susanna.lemmela@helsinki.fi           | FinnGen Analysis working group | FinnGen Analysis working group |
| Manuel Rivas                | University of Stanford, Stanford, CA, United States                                                | mrivas@stanford.edu                   | FinnGen Analysis working group | FinnGen Analysis working group |
| Mari E. Niemi               | Institute for Molecular Medicine Finland (FIMM), HiLIFE, University of Helsinki, Helsinki, Finland | mari.e.niemi@helsinki.fi              | FinnGen Analysis working group | FinnGen Analysis working group |
| Aarno Palotie               | Institute for Molecular Medicine Finland (FIMM), HiLIFE, University of Helsinki, Helsinki, Finland | aarno.palotie@helsinki.fi             | FinnGen Analysis working group | FinnGen Analysis working group |
| Aoxing Liu                  | Institute for Molecular Medicine Finland (FIMM), HiLIFE, University of Helsinki, Helsinki, Finland | aoxing.liu@helsinki.fi                | FinnGen Analysis working group | FinnGen Analysis working group |
| Arto Lehisto                | Institute for Molecular Medicine Finland (FIMM), HiLIFE, University of Helsinki, Helsinki, Finland | arto.lehisto@helsinki.fi              | FinnGen Analysis working group | FinnGen Analysis working group |
| Andrea Ganna                | Institute for Molecular Medicine Finland (FIMM), HiLIFE, University of Helsinki, Helsinki, Finland | aganna@broadinstitute.org             | FinnGen Analysis working group | FinnGen Analysis working group |
| Vincent Llorens             | Institute for Molecular Medicine Finland (FIMM), HiLIFE, University of Helsinki, Helsinki, Finland | vincent.llorens@helsinki.fi           | FinnGen Analysis working group | FinnGen Analysis working group |
| Hannele Laivuori            | Institute for Molecular Medicine Finland (FIMM), HiLIFE, University of Helsinki, Helsinki, Finland | hannele.laivuori@helsinki.fi          | FinnGen Analysis working group | FinnGen Analysis working group |
| Taru Tukiainen              | Institute for Molecular Medicine Finland (FIMM), HiLIFE, University of Helsinki, Helsinki, Finland | taru.tukiainen@helsinki.fi            | FinnGen Analysis working group | FinnGen Analysis working group |
| Mary Pat Reeve              | Institute for Molecular Medicine Finland (FIMM), HiLIFE, University of Helsinki, Helsinki, Finland | mary.reeve@helsinki.fi                | FinnGen Analysis working group | FinnGen Analysis working group |
| Henrike Heyne               | Institute for Molecular Medicine Finland (FIMM), HiLIFE, University of Helsinki, Helsinki, Finland | hheyne@broadinstitute.org             | FinnGen Analysis working group | FinnGen Analysis working group |
| Nina Mars                   | Institute for Molecular Medicine Finland (FIMM), HiLIFE, University of Helsinki, Helsinki, Finland | nina.mars@helsinki.fi                 | FinnGen Analysis working group | FinnGen Analysis working group |
| Joel Rämö                   | Institute for Molecular Medicine Finland (FIMM), HiLIFE, University of Helsinki, Helsinki, Finland | joel.ramo@helsinki.fi                 | FinnGen Analysis working group | FinnGen Analysis working group |
| Elmo Saarentaus             | Institute for Molecular Medicine Finland (FIMM), HiLIFE, University of Helsinki, Helsinki, Finland | elmo.saarentaus@helsinki.fi           | FinnGen Analysis working group | FinnGen Analysis working group |
| Hanna Ollila                | Institute for Molecular Medicine Finland (FIMM), HiLIFE, University of Helsinki, Helsinki, Finland | hanna.m.ollila@helsinki.fi            | FinnGen Analysis working group | FinnGen Analysis working group |
| Rodos Rodosthenous          | Institute for Molecular Medicine Finland (FIMM), HiLIFE, University of Helsinki, Helsinki, Finland | rodos.rodosthenous@helsinki.fi        | FinnGen Analysis working group | FinnGen Analysis working group |
| Satu Strausz                | Institute for Molecular Medicine Finland (FIMM), HiLIFE, University of Helsinki, Helsinki, Finland | satu.strausz@helsinki.fi              | FinnGen Analysis working group | FinnGen Analysis working group |
| Tuula Palotie               | University of Helsinki and Hospital District of Helsinki and Uusimaa, Helsinki, Finland            | tuula.palotie@helsinki.fi             | FinnGen Analysis working group | FinnGen Analysis working group |
| Kimmo Palin                 | University of Helsinki, Helsinki, Finland                                                          | kimmo.palin@helsinki.fi               | FinnGen Analysis working group | FinnGen Analysis working group |

|                        |                                                                                                                                                                                             |                               |                                |                                |
|------------------------|---------------------------------------------------------------------------------------------------------------------------------------------------------------------------------------------|-------------------------------|--------------------------------|--------------------------------|
| Javier Garcia-Tabuenca | University of Tampere, Tampere, Finland                                                                                                                                                     | javier.graciatabuenca@tuni.fi | FinnGen Analysis working group | FinnGen Analysis working group |
| Harri Siirtola         | University of Tampere, Tampere, Finland                                                                                                                                                     | harri.siirtola@tuni.fi        | FinnGen Analysis working group | FinnGen Analysis working group |
| Tuomo Kiiskinen        | Institute for Molecular Medicine Finland (FIMM), HiLIFE, University of Helsinki, Helsinki, Finland                                                                                          | tuomo.kiiskinen@helsinki.fi   | FinnGen Analysis working group | FinnGen Analysis working group |
| Jiwoo Lee              | Institute for Molecular Medicine Finland (FIMM), HiLIFE, University of Helsinki, Helsinki, Finland; Broad Institute, Cambridge, MA, United States                                           | jiwoo.lee@helsinki.fi         | FinnGen Analysis working group | FinnGen Analysis working group |
| Kristin Tsuo           | Institute for Molecular Medicine Finland (FIMM), HiLIFE, University of Helsinki, Helsinki, Finland; Broad Institute, Cambridge, MA, United States                                           | kristintsuo@fas.harvard.edu   | FinnGen Analysis working group | FinnGen Analysis working group |
| Amanda Elliott         | Institute for Molecular Medicine Finland (FIMM), HiLIFE, University of Helsinki, Helsinki, Finland; Broad Institute, Cambridge, MA, USA and Massachusetts General Hospital, Boston, MA, USA | aelliott@broadinstitute.org   | FinnGen Analysis working group | FinnGen Analysis working group |
| Kati Kristiansson      | THL Biobank / Finnish Institute for Health and Welfare (THL), Helsinki, Finland                                                                                                             | kati.kristiansson@thl.fi      | FinnGen Analysis working group | FinnGen Analysis working group |
| Mikko Arvas            | Finnish Red Cross Blood Service / Finnish Hematology Registry and Clinical Biobank, Helsinki, Finland                                                                                       | mikko.arvas@veripalvelu.fi    | FinnGen Analysis working group | FinnGen Analysis working group |
| Kati Hyvärinen         | Finnish Red Cross Blood Service, Helsinki, Finland                                                                                                                                          | kati.hyvarinen@veripalvelu.fi | FinnGen Analysis working group | FinnGen Analysis working group |
| Jarmo Ritari           | Finnish Red Cross Blood Service, Helsinki, Finland                                                                                                                                          | jarmo.ritari@veripalvelu.fi   | FinnGen Analysis working group | FinnGen Analysis working group |
| Olli Carpén            | Helsinki Biobank / Helsinki University and Hospital District of Helsinki and Uusimaa, Helsinki                                                                                              | olli.carpén@helsinki.fi       | FinnGen Analysis working group | FinnGen Analysis working group |
| Johannes Kettunen      | Northern Finland Biobank Borealis / University of Oulu / Northern Ostrobothnia Hospital District, Oulu, Finland                                                                             | johannes.kettunen@oulu.fi     | FinnGen Analysis working group | FinnGen Analysis working group |
| Katri Pylkäs           | University of Oulu, Oulu, Finland                                                                                                                                                           | katri.pylkas@oulu.fi          | FinnGen Analysis working group | FinnGen Analysis working group |
| Eeva Sliz              | University of Oulu, Oulu, Finland                                                                                                                                                           | eeva.sliz@oulu.fi             | FinnGen Analysis working group | FinnGen Analysis working group |
| Minna Karjalainen      | University of Oulu, Oulu, Finland                                                                                                                                                           | minna.k.karjalainen@oulu.fi   | FinnGen Analysis working group | FinnGen Analysis working group |
| Tuomo Mantere          | Northern Finland Biobank Borealis / University of Oulu / Northern Ostrobothnia Hospital District, Oulu, Finland                                                                             | tuomo.mantere@oulu.fi         | FinnGen Analysis working group | FinnGen Analysis working group |
| Eeva Kangasniemi       | Finnish Clinical Biobank Tampere / University of Tampere / Pirkanmaa Hospital District, Tampere, Finland                                                                                    | eeva.kangasniemi@pshp.fi      | FinnGen Analysis working group | FinnGen Analysis working group |
| Sami Heikkinen         | University of Eastern Finland, Kuopio, Finland                                                                                                                                              | sami.heikkinen@uef.fi         | FinnGen Analysis working group | FinnGen Analysis working group |
| Arto Mannermaa         | Biobank of Eastern Finland / University of Eastern Finland / Northern Savo Hospital District, Kuopio, Finland                                                                               | arto.mannermaa@uef.fi         | FinnGen Analysis working group | FinnGen Analysis working group |
| Eija Laakkonen         | University of Jyväskylä, Jyväskylä, Finland                                                                                                                                                 | eija.k.laakkonen@jyu.fi       | FinnGen Analysis working group | FinnGen Analysis working group |
| Nina Pitkänen          | Auria Biobank / University of Turku / Hospital District of Southwest Finland, Turku, Finland                                                                                                | Niina.Pitkanen@tyks.fi        | FinnGen Analysis working group | FinnGen Analysis working group |
| Samuel Lessard         | Translational Sciences, Sanofi R&D, Framingham, MA, USA                                                                                                                                     | samuel.lessard@sanofi.com     | FinnGen Analysis working group | FinnGen Analysis working group |
| Clément Chatelain      | Translational Sciences, Sanofi R&D, Framingham, MA, USA                                                                                                                                     | clement.chatelain@sanofi.com  | FinnGen Analysis working group | FinnGen Analysis working group |
| Perttu Terho           | Auria Biobank / University of Turku / Hospital District of Southwest Finland, Turku, Finland                                                                                                | perttu.terho@tyks.fi          | Biobank directors              | Biobank directors              |

|                             |                                                                                                                                                                       |                                       |                   |                               |
|-----------------------------|-----------------------------------------------------------------------------------------------------------------------------------------------------------------------|---------------------------------------|-------------------|-------------------------------|
| Sirpa Soini                 | THL Biobank / Finnish Institute for Health and Welfare (THL), Helsinki, Finland                                                                                       | sirpa.soini@thl.fi                    | Biobank directors | Biobank directors             |
| Jukka Partanen              | Finnish Red Cross Blood Service / Finnish Hematology Registry and Clinical Biobank, Helsinki, Finland                                                                 | jukka.partanen@veripalvelu.fi         | Biobank directors | Biobank directors             |
| Eero Punkka                 | Helsinki Biobank / Helsinki University and Hospital District of Helsinki and Uusimaa, Helsinki                                                                        | eero.punkka@hus.fi                    | Biobank directors | Biobank directors             |
| Raisa Serpi                 | Northern Finland Biobank Borealis / University of Oulu / Northern Ostrobothnia Hospital District, Oulu, Finland                                                       | raisa.serpi@ppshp.fi                  | Biobank directors | Biobank directors             |
| Sanna Siltanen              | Finnish Clinical Biobank Tampere / University of Tampere / Pirkanmaa Hospital District, Tampere, Finland                                                              | sanna.siltanen@pshp.fi                | Biobank directors | Biobank directors             |
| Veli-Matti Kosma            | Biobank of Eastern Finland / University of Eastern Finland / Northern Savo Hospital District, Kuopio, Finland                                                         | veli-matti.kosma@uef.fi               | Biobank directors | Biobank directors             |
| Teijo Kuopio                | Central Finland Biobank / University of Jyväskylä / Central Finland Health Care District, Jyväskylä, Finland                                                          | teijo.kuopio@ksshp.fi                 | Biobank directors | Biobank directors             |
| Anu Jalanko                 | Institute for Molecular Medicine Finland (FIMM), HiLIFE, University of Helsinki, Helsinki, Finland                                                                    | anu.jalanko@helsinki.fi               | FinnGen Teams     | Administration                |
| Huei-Yi Shen                | Institute for Molecular Medicine Finland (FIMM), HiLIFE, University of Helsinki, Helsinki, Finland                                                                    | huei-yi.shen@helsinki.fi              | FinnGen Teams     | Administration                |
| Risto Kajanne               | Institute for Molecular Medicine Finland (FIMM), HiLIFE, University of Helsinki, Helsinki, Finland                                                                    | risto.kajanne@helsinki.fi             | FinnGen Teams     | Administration                |
| Mervi Aavikko               | Institute for Molecular Medicine Finland (FIMM), HiLIFE, University of Helsinki, Helsinki, Finland                                                                    | mervi.aavikko@helsinki.fi             | FinnGen Teams     | Administration                |
| Henna Palin                 | Finnish Clinical Biobank Tampere / University of Tampere / Pirkanmaa Hospital District, Tampere, Finland                                                              | henna.palin@pshp.fi                   | FinnGen Teams     | Administration                |
| Malla-Maria Linna           | Helsinki Biobank / Helsinki University and Hospital District of Helsinki and Uusimaa, Helsinki                                                                        | malla-maria.linna@hus.fi              | FinnGen Teams     | Administration                |
| Mitja Kurki                 | Institute for Molecular Medicine Finland (FIMM), HiLIFE, University of Helsinki, Helsinki, Finland; Broad Institute, Cambridge, MA, United States                     | mkurki@broadinstitute.org             | FinnGen Teams     | Analysis                      |
| Juha Karjalainen            | Institute for Molecular Medicine Finland (FIMM), HiLIFE, University of Helsinki, Helsinki, Finland                                                                    | juha.karjalainen@helsinki.fi          | FinnGen Teams     | Analysis                      |
| Pietro Della Briotta Parolo | Institute for Molecular Medicine Finland (FIMM), HiLIFE, University of Helsinki, Helsinki, Finland                                                                    | pietro.dellabriottaparolo@helsinki.fi | FinnGen Teams     | Analysis                      |
| Arto Lehisto                | Institute for Molecular Medicine Finland (FIMM), HiLIFE, University of Helsinki, Helsinki, Finland                                                                    | arto.lehisto@helsinki.fi              | FinnGen Teams     | Analysis                      |
| Juha Mehtonen               | Institute for Molecular Medicine Finland (FIMM), HiLIFE, University of Helsinki, Helsinki, Finland                                                                    | juha.mehtonen@helsinki.fi             | FinnGen Teams     | Analysis                      |
| Wei Zhou                    | Broad Institute, Cambridge, MA, United States                                                                                                                         | wzhou@broadinstitute.org              | FinnGen Teams     | Analysis                      |
| Masahiro Kanai              | Broad Institute, Cambridge, MA, United States                                                                                                                         | mkanai@broadinstitute.org             | FinnGen Teams     | Analysis                      |
| Mutaamba Maasha             | Broad Institute, Cambridge, MA, United States                                                                                                                         | mmaasha@broadinstitute.org            | FinnGen Teams     | Analysis                      |
| Hannele Laivuori            | Institute for Molecular Medicine Finland (FIMM), HiLIFE, University of Helsinki, Helsinki, Finland                                                                    | hannele.laivuori@helsinki.fi          | FinnGen Teams     | Clinical Endpoint Development |
| Aki Havulinna               | Institute for Molecular Medicine Finland (FIMM), HiLIFE, University of Helsinki, Helsinki, Finland; Finnish Institute for Health and Welfare (THL), Helsinki, Finland | aki.havulinna@helsinki.fi             | FinnGen Teams     | Clinical Endpoint Development |
| Susanna Lemmelä             | Institute for Molecular Medicine Finland (FIMM), HiLIFE, University of Helsinki, Helsinki, Finland                                                                    | susanna.lemmela@helsinki.fi           | FinnGen Teams     | Clinical Endpoint Development |
| Tuomo Kiiskinen             | Institute for Molecular Medicine Finland (FIMM), HiLIFE, University of Helsinki, Helsinki, Finland                                                                    | tuomo.kiiskinen@helsinki.fi           | FinnGen Teams     | Clinical Endpoint Development |

|                          |                                                                                                    |                                                                                      |               |                                |
|--------------------------|----------------------------------------------------------------------------------------------------|--------------------------------------------------------------------------------------|---------------|--------------------------------|
| L. Elisa Lahtela         | Institute for Molecular Medicine Finland (FIMM), HiLIFE, University of Helsinki, Helsinki, Finland | <a href="mailto:laura.lahtela@helsinki.fi">laura.lahtela@helsinki.fi</a>             | FinnGen Teams | Clinical Endpoint Development  |
| Mari Kaunisto            | Institute for Molecular Medicine Finland (FIMM), HiLIFE, University of Helsinki, Helsinki, Finland | <a href="mailto:mari.kaunisto@helsinki.fi">mari.kaunisto@helsinki.fi</a>             | FinnGen Teams | Communication                  |
| Elina Kilpeläinen        | Institute for Molecular Medicine Finland (FIMM), HiLIFE, University of Helsinki, Helsinki, Finland | <a href="mailto:elina.kilpelainen@helsinki.fi">elina.kilpelainen@helsinki.fi</a>     | FinnGen Teams | E-Science                      |
| Timo P. Sipilä           | Institute for Molecular Medicine Finland (FIMM), HiLIFE, University of Helsinki, Helsinki, Finland | <a href="mailto:timo.p.sipila@helsinki.fi">timo.p.sipila@helsinki.fi</a>             | FinnGen Teams | E-Science                      |
| Oluwaseun Alexander Dada | Institute for Molecular Medicine Finland (FIMM), HiLIFE, University of Helsinki, Helsinki, Finland | <a href="mailto:alexander.dada@helsinki.fi">alexander.dada@helsinki.fi</a>           | FinnGen Teams | E-Science                      |
| Awaisa Ghazal            | Institute for Molecular Medicine Finland (FIMM), HiLIFE, University of Helsinki, Helsinki, Finland | <a href="mailto:awaisa.ghazal@helsinki.fi">awaisa.ghazal@helsinki.fi</a>             | FinnGen Teams | E-Science                      |
| Anastasia Kytölä         | Institute for Molecular Medicine Finland (FIMM), HiLIFE, University of Helsinki, Helsinki, Finland | <a href="mailto:anastasia.shcherban@helsinki.fi">anastasia.shcherban@helsinki.fi</a> | FinnGen Teams | E-Science                      |
| Rigbe Weldatsadik        | Institute for Molecular Medicine Finland (FIMM), HiLIFE, University of Helsinki, Helsinki, Finland | <a href="mailto:rigbe.weldatsadik@helsinki.fi">rigbe.weldatsadik@helsinki.fi</a>     | FinnGen Teams | E-Science                      |
| Sanni Ruotsalainen       | Institute for Molecular Medicine Finland (FIMM), HiLIFE, University of Helsinki, Helsinki, Finland | <a href="mailto:sanni.ruotsalainen@helsinki.fi">sanni.ruotsalainen@helsinki.fi</a>   | FinnGen Teams | E-Science                      |
| Kati Donner              | Institute for Molecular Medicine Finland (FIMM), HiLIFE, University of Helsinki, Helsinki, Finland | <a href="mailto:kati.donner@helsinki.fi">kati.donner@helsinki.fi</a>                 | FinnGen Teams | Genotyping                     |
| Timo P. Sipilä           | Institute for Molecular Medicine Finland (FIMM), HiLIFE, University of Helsinki, Helsinki, Finland | <a href="mailto:timo.p.sipila@helsinki.fi">timo.p.sipila@helsinki.fi</a>             | FinnGen Teams | Genotyping                     |
| Anu Loukola              | Helsinki Biobank / Helsinki University and Hospital District of Helsinki and Uusimaa, Helsinki     | <a href="mailto:anu.loukola@hus.fi">anu.loukola@hus.fi</a>                           | FinnGen Teams | Sample Collection Coordination |
| Päivi Laiho              | THL Biobank / Finnish Institute for Health and Welfare (THL), Helsinki, Finland                    | <a href="mailto:paivi.laiho@thl.fi">paivi.laiho@thl.fi</a>                           | FinnGen Teams | Sample Logistics               |
| Tuuli Sistonen           | THL Biobank / Finnish Institute for Health and Welfare (THL), Helsinki, Finland                    | <a href="mailto:tuuli.sistonen@thl.fi">tuuli.sistonen@thl.fi</a>                     | FinnGen Teams | Sample Logistics               |
| Essi Kaiharju            | THL Biobank / Finnish Institute for Health and Welfare (THL), Helsinki, Finland                    | <a href="mailto:essi.kaiharju@thl.fi">essi.kaiharju@thl.fi</a>                       | FinnGen Teams | Sample Logistics               |
| Markku Laukkanen         | THL Biobank / Finnish Institute for Health and Welfare (THL), Helsinki, Finland                    | <a href="mailto:markku.laukkanen@thl.fi">markku.laukkanen@thl.fi</a>                 | FinnGen Teams | Sample Logistics               |
| Elina Järvensivu         | THL Biobank / Finnish Institute for Health and Welfare (THL), Helsinki, Finland                    | <a href="mailto:elina.jarvensivu@thl.fi">elina.jarvensivu@thl.fi</a>                 | FinnGen Teams | Sample Logistics               |
| Sini Lähteenmäki         | THL Biobank / Finnish Institute for Health and Welfare (THL), Helsinki, Finland                    | <a href="mailto:sini.lahteenmaki@thl.fi">sini.lahteenmaki@thl.fi</a>                 | FinnGen Teams | Sample Logistics               |
| Lotta Männikkö           | THL Biobank / Finnish Institute for Health and Welfare (THL), Helsinki, Finland                    | <a href="mailto:lotta.mannikko@thl.fi">lotta.mannikko@thl.fi</a>                     | FinnGen Teams | Sample Logistics               |
| Regis Wong               | THL Biobank / Finnish Institute for Health and Welfare (THL), Helsinki, Finland                    | <a href="mailto:regis.wong@thl.fi">regis.wong@thl.fi</a>                             | FinnGen Teams | Sample Logistics               |
| Auli Toivola             | THL Biobank / Finnish Institute for Health and Welfare (THL), Helsinki, Finland                    | <a href="mailto:auli.toivola@thl.fi">auli.toivola@thl.fi</a>                         | FinnGen Teams | Sample Logistics               |
| Minna Brunfeldt          | THL Biobank / Finnish Institute for Health and Welfare (THL), Helsinki, Finland                    | <a href="mailto:minna.brunfeldt@thl.fi">minna.brunfeldt@thl.fi</a>                   | FinnGen Teams | Registry Data Operations       |
| Hannele Mattsson         | THL Biobank / Finnish Institute for Health and Welfare (THL), Helsinki, Finland                    | <a href="mailto:hannele.mattsson@thl.fi">hannele.mattsson@thl.fi</a>                 | FinnGen Teams | Registry Data Operations       |
| Kati Kristiansson        | THL Biobank / Finnish Institute for Health and Welfare (THL), Helsinki, Finland                    | <a href="mailto:kati.kristiansson@thl.fi">kati.kristiansson@thl.fi</a>               | FinnGen Teams | Registry Data Operations       |
| Susanna Lemmelä          | Institute for Molecular Medicine Finland (FIMM), HiLIFE, University of Helsinki, Helsinki, Finland | <a href="mailto:susanna.lemmela@helsinki.fi">susanna.lemmela@helsinki.fi</a>         | FinnGen Teams | Registry Data Operations       |
| Sami Koskelainen         | THL Biobank / Finnish Institute for Health and Welfare (THL), Helsinki, Finland                    | <a href="mailto:sami.koskelainen@thl.fi">sami.koskelainen@thl.fi</a>                 | FinnGen Teams | Registry Data Operations       |
| Tero Hiekkalinna         | THL Biobank / Finnish Institute for Health and Welfare (THL), Helsinki, Finland                    | <a href="mailto:tero.hiekkalinna@helsinki.fi">tero.hiekkalinna@helsinki.fi</a>       | FinnGen Teams | Registry Data Operations       |

|                                |                                                                                                    |                              |               |                                     |
|--------------------------------|----------------------------------------------------------------------------------------------------|------------------------------|---------------|-------------------------------------|
| Teemu Paajanen                 | THL Biobank / Finnish Institute for Health and Welfare (THL), Helsinki, Finland                    | teemu.paajanen@thl.fi        | FinnGen Teams | Registry Operations Data            |
| Priit Palta                    | Institute for Molecular Medicine Finland (FIMM), HiLIFE, University of Helsinki, Helsinki, Finland | priit.palta@helsinki.fi      | FinnGen Teams | Sequencing Informatics              |
| Kalle Pärn                     | Institute for Molecular Medicine Finland (FIMM), HiLIFE, University of Helsinki, Helsinki, Finland | kalle.parn@helsinki.fi       | FinnGen Teams | Sequencing Informatics              |
| Mart Kals                      | Institute for Molecular Medicine Finland (FIMM), HiLIFE, University of Helsinki, Helsinki, Finland | mart.kals@helsinki.fi        | FinnGen Teams | Sequencing Informatics              |
| Shuang Luo                     | Institute for Molecular Medicine Finland (FIMM), HiLIFE, University of Helsinki, Helsinki, Finland | shuang.luo@helsinki.fi       | FinnGen Teams | Sequencing Informatics              |
| Tarja Laitinen                 | Pirkanmaa Hospital District, Tampere, Finland                                                      | tarja.laitinen@pshp.fi       | FinnGen Teams | Trajectory                          |
| Mary Pat Reeve                 | Institute for Molecular Medicine Finland (FIMM), HiLIFE, University of Helsinki, Helsinki, Finland | mary.reeve@helsinki.fi       | FinnGen Teams | Trajectory                          |
| Shanmukha Sampath Padmanabhuni | Institute for Molecular Medicine Finland (FIMM), HiLIFE, University of Helsinki, Helsinki, Finland | sam.padmanabhuni@helsinki.fi | FinnGen Teams | Trajectory                          |
| Marianna Niemi                 | University of Tampere, Tampere, Finland                                                            | marianna.niemi@tuni.fi       | FinnGen Teams | Trajectory                          |
| Harri Siirtola                 | University of Tampere, Tampere, Finland                                                            | harri.siirtola@tuni.fi       | FinnGen Teams | Trajectory                          |
| Javier Gracia-Tabuena          | University of Tampere, Tampere, Finland                                                            | javier.graciatabuena@tuni.fi | FinnGen Teams | Trajectory                          |
| Mika Helminen                  | University of Tampere, Tampere, Finland                                                            | mika.helminen@tuni.fi        | FinnGen Teams | Trajectory                          |
| Tiina Luukkaala                | University of Tampere, Tampere, Finland                                                            | tiina.luukkaala@tuni.fi      | FinnGen Teams | Trajectory                          |
| Iida Vähätalo                  | University of Tampere, Tampere, Finland                                                            | iida.vahatalo@epshp.fi       | FinnGen Teams | Trajectory                          |
| Jyrki Pitkänen                 | Institute for Molecular Medicine Finland (FIMM), HiLIFE, University of Helsinki, Helsinki, Finland | jyrki.pitkanen@helsinki.fi   | FinnGen Teams | Data protection officer             |
| Marco Hautalahti               | Finnish Biobank Cooperative - FINBB                                                                | marco.hautalahti@finbb.fi    | FinnGen Teams | FINBB - Finnish biobank cooperative |
| Johanna Mäkelä                 | Finnish Biobank Cooperative - FINBB                                                                | johanna.makela@finbb.fi      | FinnGen Teams | FINBB - Finnish biobank cooperative |
| Sarah Smith                    | Finnish Biobank Cooperative - FINBB                                                                | sarah.smith@finbb.fi         | FinnGen Teams | FINBB - Finnish biobank cooperative |
| Tom Southerington              | Finnish Biobank Cooperative - FINBB                                                                | tom.southerington@finbb.fi   | FinnGen Teams | FINBB - Finnish biobank cooperative |

# Figure 1

a)

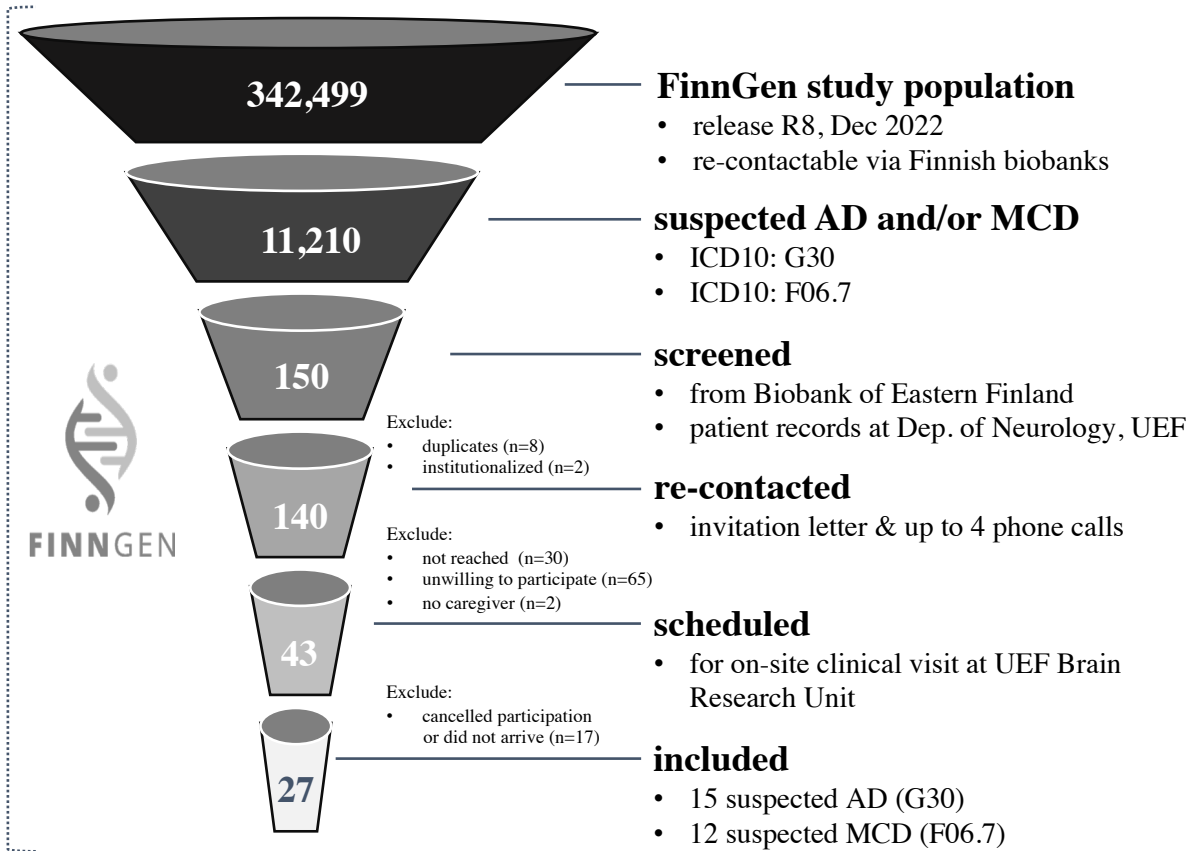

b)

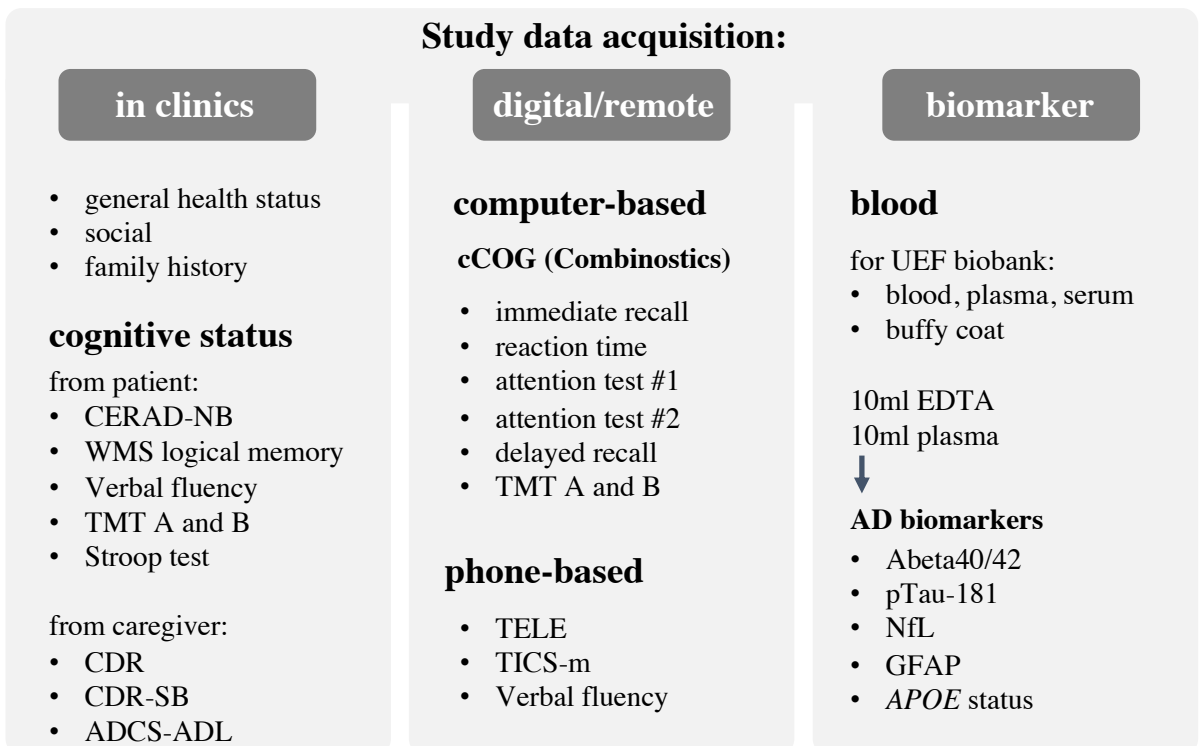

**Figure 2**

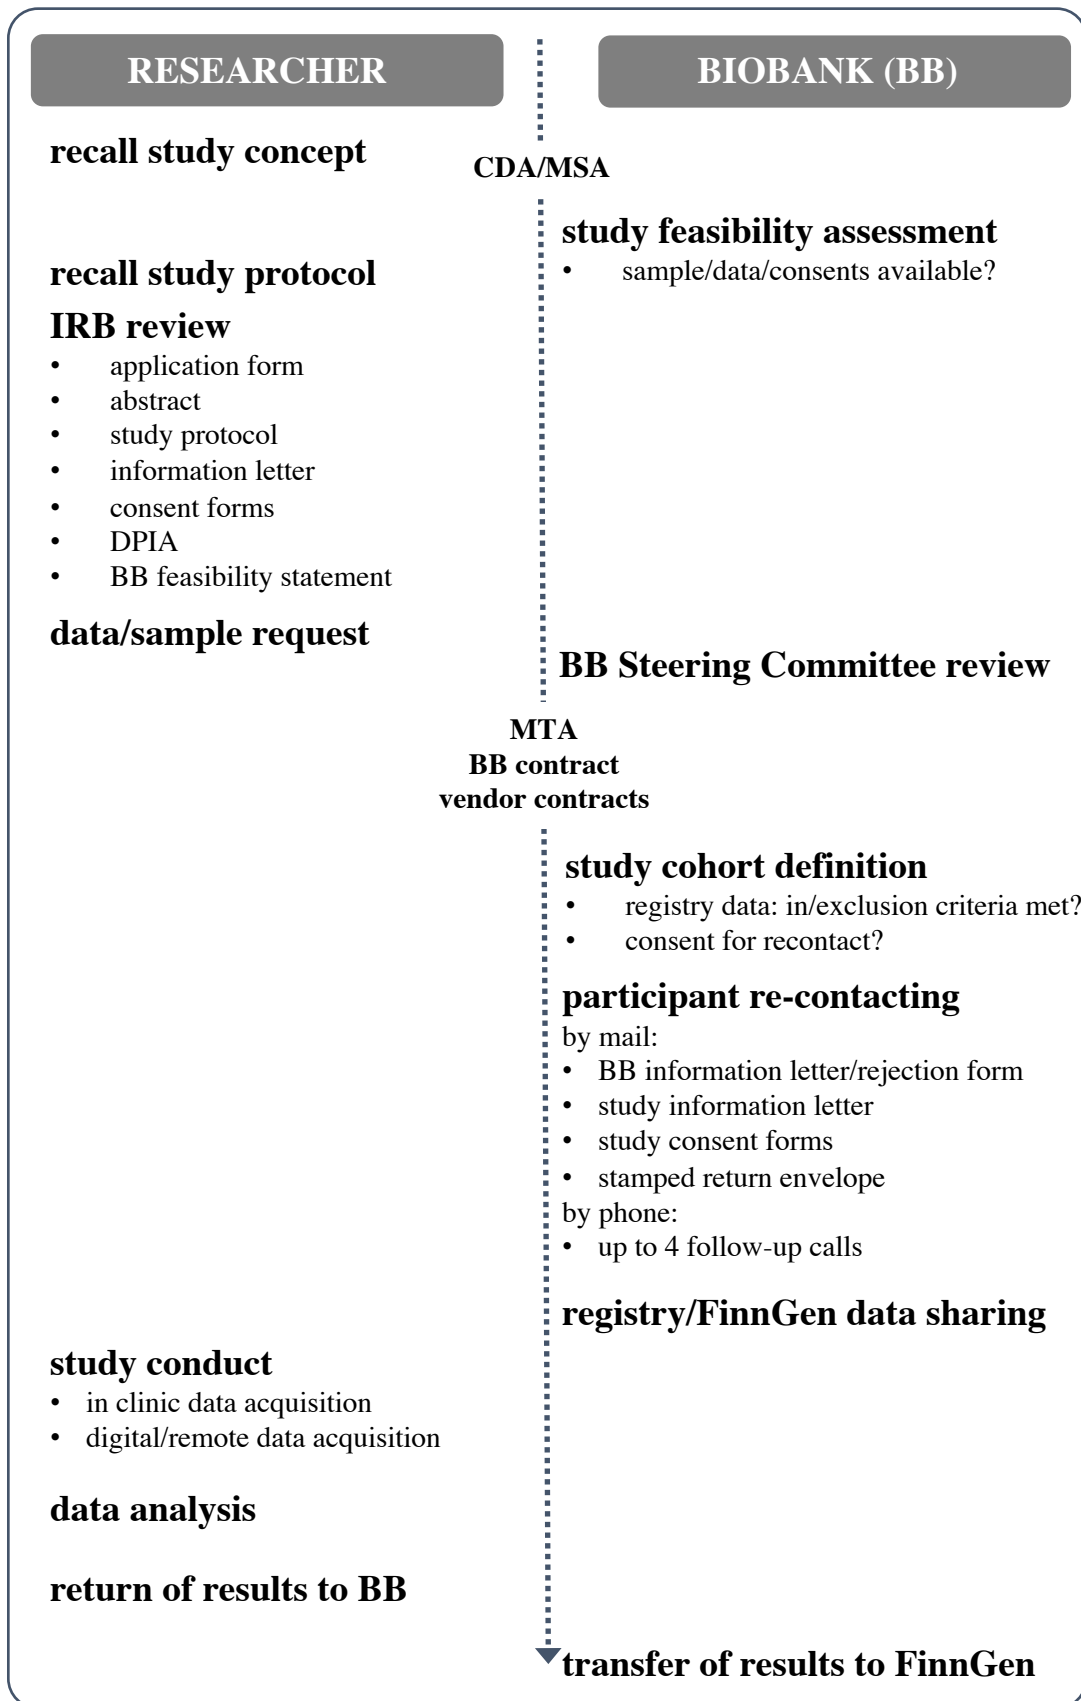



**Figure 3**

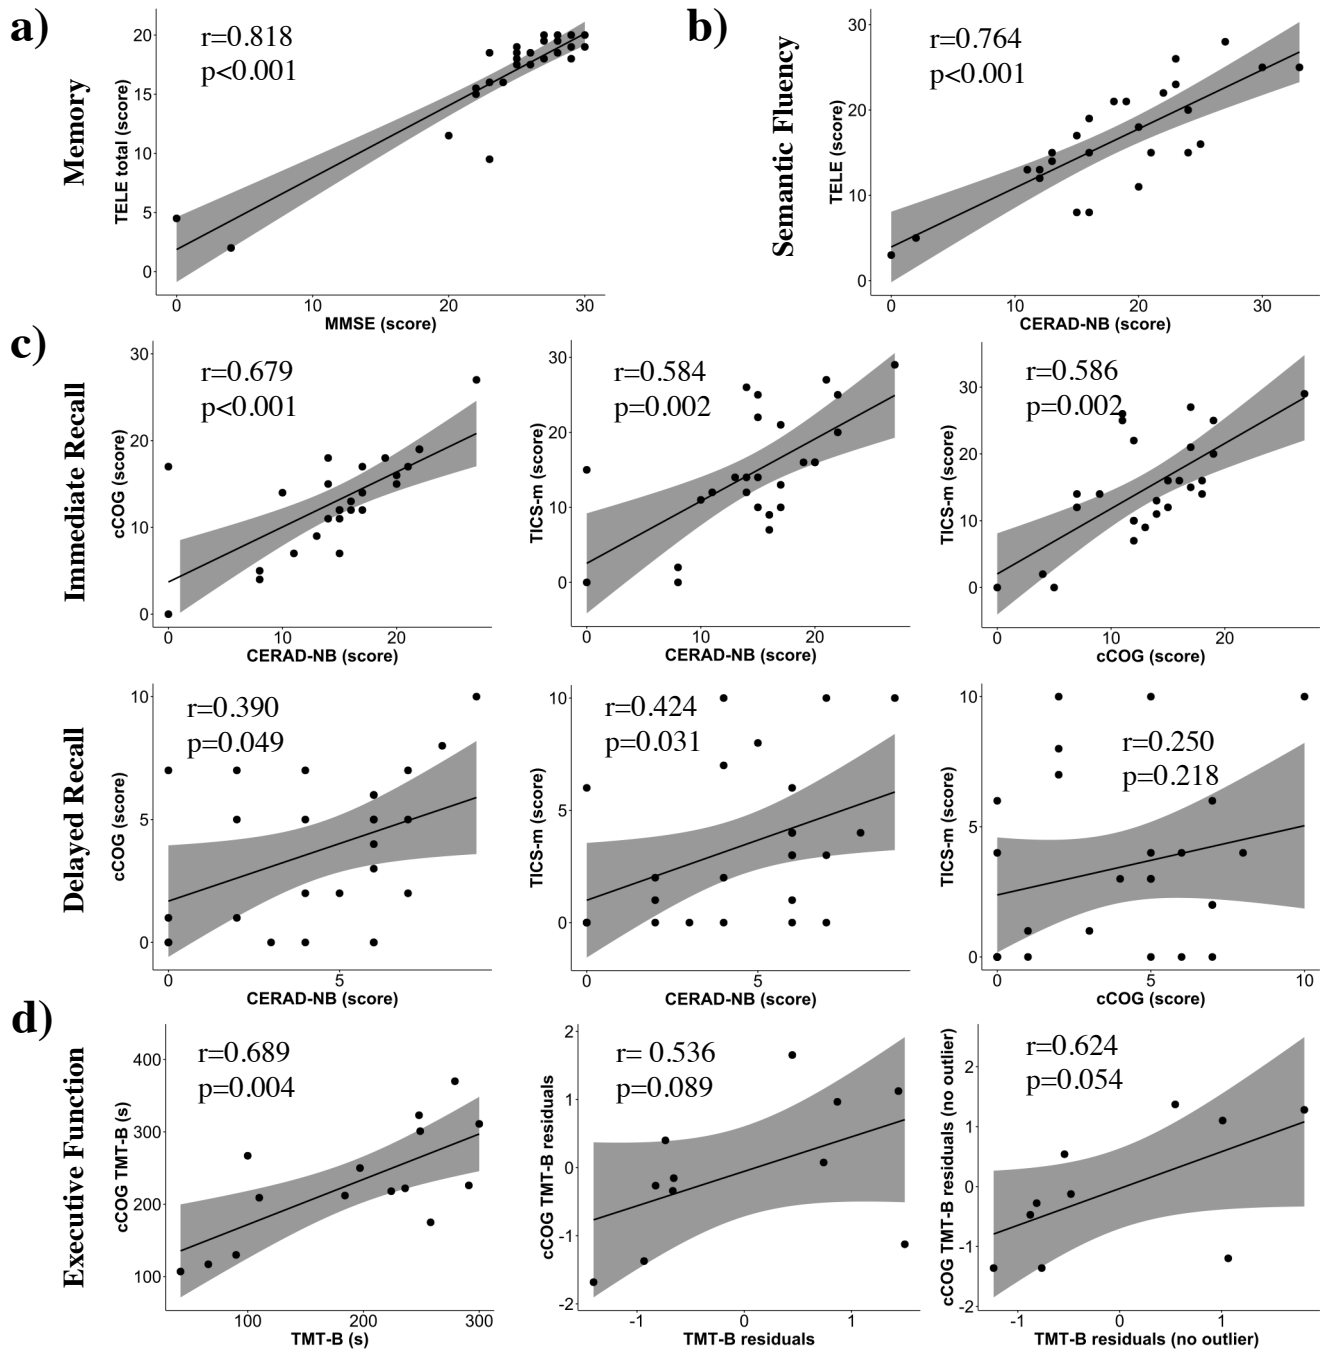

Source: https://medrxiv.org/content/10.1101/2023.02.06.23285534v1.full.pdf
